# Supplementary material for: Ectopic pregnancy: exploration of its global research architecture using density-equalising mapping and socioeconomic benchmarks
Source: PubMed Central journal article supplement — BMJ Open. 2017 Oct 11;7(10):e018394. doi: 10.1136/bmjopen-2017-018394 (PMC5652463; doi:10.1136/bmjopen-2017-018394), 2017-10-11
Supplement: bmjopen-2017-018394.draft_revisions.pdf [file bmjopen-2017-018394.draft_revisions.pdf]

# BMJ Open

BMJ Open is committed to open peer review. As part of this commitment we make the peer review history of every article we publish publicly available.

When an article is published we post the peer reviewers' comments and the authors' responses online. We also post the versions of the paper that were used during peer review. These are the versions that the peer review comments apply to.

The versions of the paper that follow are the versions that were submitted during the peer review process. They are not the versions of record or the final published versions. They should not be cited or distributed as the published version of this manuscript.

BMJ Open is an open access journal and the full, final, typeset and author-corrected version of record of the manuscript is available on our site with no access controls, subscription charges or pay-per-view fees (<http://bmjopen.bmj.com>).

If you have any questions on BMJ Open's open peer review process please email [editorial.bmjopen@bmj.com](mailto:editorial.bmjopen@bmj.com)

# BMJ Open

## Ectopic pregnancy – exploration of its global research architecture using density-equalizing mapping and socioeconomic benchmarks

|                                 |                                                                                                                                                                                                                                                                                                                                                                                                                                                                                                                                                                                                                                                                                                                                                                                                                                                                                                      |
|---------------------------------|------------------------------------------------------------------------------------------------------------------------------------------------------------------------------------------------------------------------------------------------------------------------------------------------------------------------------------------------------------------------------------------------------------------------------------------------------------------------------------------------------------------------------------------------------------------------------------------------------------------------------------------------------------------------------------------------------------------------------------------------------------------------------------------------------------------------------------------------------------------------------------------------------|
| Journal:                        | <i>BMJ Open</i>                                                                                                                                                                                                                                                                                                                                                                                                                                                                                                                                                                                                                                                                                                                                                                                                                                                                                      |
| Manuscript ID                   | bmjopen-2017-018394                                                                                                                                                                                                                                                                                                                                                                                                                                                                                                                                                                                                                                                                                                                                                                                                                                                                                  |
| Article Type:                   | Research                                                                                                                                                                                                                                                                                                                                                                                                                                                                                                                                                                                                                                                                                                                                                                                                                                                                                             |
| Date Submitted by the Author:   | 26-Jun-2017                                                                                                                                                                                                                                                                                                                                                                                                                                                                                                                                                                                                                                                                                                                                                                                                                                                                                          |
| Complete List of Authors:       | Brüggmann, Dörthe; Goethe-Universität Institute of Occupational, Social and Environmental Medicine<br>Kollascheck, Jana; Goethe-Universität Frankfurt am Main Institut für Arbeits Sozial und Umweltmedizin<br>Quarcoo, David; Goethe University, Institute of Occupational Medicine, Social Medicine and Environmental Medicine<br>Bendels, Michael; Goethe-Universität Frankfurt am Main, Institute of Occupational Medicine, Social Medicine and Environmental Medicine<br>Klingelhofer, Doris; Goethe University, Institute of Occupational Medicine<br>Louwen, Frank; Goethe University, Department of Obstetrics and Gynecology<br>Jaque, Jenny; Keck School of Medicine of the University of Southern California, Department of Obstetrics and Gynecology<br>Groneberg, David; Occupational, Social and Environmental Medicine, Medical Department of the Goethe-University Frankfurt am Main |
| <b>Primary Subject Heading</b>: | Obstetrics and gynaecology                                                                                                                                                                                                                                                                                                                                                                                                                                                                                                                                                                                                                                                                                                                                                                                                                                                                           |
| Secondary Subject Heading:      | Epidemiology, Global health, Health informatics                                                                                                                                                                                                                                                                                                                                                                                                                                                                                                                                                                                                                                                                                                                                                                                                                                                      |
| Keywords:                       | ectopic pregnancy, density equalizing mapping, female health, reproduction biology                                                                                                                                                                                                                                                                                                                                                                                                                                                                                                                                                                                                                                                                                                                                                                                                                   |
|                                 |                                                                                                                                                                                                                                                                                                                                                                                                                                                                                                                                                                                                                                                                                                                                                                                                                                                                                                      |

SCHOLARONE™  
Manuscripts

1  
2  
3 **Ectopic pregnancy – exploration of its global research architecture using**  
4 **density-equalizing mapping and socioeconomic benchmarks**  
5  
6  
7  
8  
9

10  
11 Short title: Global architecture of ectopic pregnancy research  
12  
13

14  
15  
16 Dörthe Brüggmann<sup>1-3\*</sup>, Jana Kollascheck<sup>2</sup>, David Quarcoo<sup>2</sup>, Michael H. Bendels<sup>2</sup>,  
17 Doris Klingelhöfer<sup>2</sup>, Frank Louwen<sup>3</sup>, Jenny M Jaque<sup>1</sup>, David A Groneberg<sup>2</sup>  
18  
19  
20  
21  
22  
23

24  
25 <sup>1</sup> Department of Obstetrics and Gynecology, Keck School of Medicine of USC, Los  
26 Angeles, California, United States of America  
27

28  
29 <sup>2</sup> Division of Female Health & Preventive Medicine, Institute of Occupational  
30 Medicine, Social Medicine and Environmental Medicine, Goethe-University,  
31 Frankfurt, Germany  
32  
33  
34

35  
36  
37 <sup>3</sup> Department of Gynecology and Obstetrics, Goethe-University, Frankfurt, Germany  
38  
39  
40  
41  
42

43 \*Corresponding author  
44

45  
46 E-mail: [prevention@uni-frankfurt.de](mailto:prevention@uni-frankfurt.de) (DB)  
47  
48  
49  
50  
51  
52  
53  
54  
55  
56  
57  
58  
59  
60

## ABSTRACT

Objective: About 2% of all pregnancies are complicated by the implantation of the zygote outside the uterine cavity and termed ectopic pregnancy. Whereas a multitude of guidelines exists and related research is constantly growing, no thorough assessment of the global research architecture has been performed yet. Hence, we aim to assess the associated scientific activities in relation to geographical and chronological developments, existing research networks and socio-economic parameters.

Design: retrospective, descriptive study

Setting: On the basis of the NewQIS platform, scientometric methods were combined with novel visualizing techniques such as density equalizing mapping to assess the scientific output on ectopic pregnancy. Using the Web of Science, we identified all related entries from 1900 to 2012.

Results: 8,040 publications were analyzed. The United States (US) and the United Kingdom (UK) were dominating the field in regards to overall research activity (2,612 and 723 publications), overall citation numbers and country-specific H-Indices (US: 80, UK: 42). Comparison to economic power of the most productive countries demonstrated that Israel invested more resources in ectopic pregnancy-related research than other nations (853.41 ectopic pregnancy-specific publications per 1000 Bio USD GDP), followed by the UK (269.97). Relation to the GDP per capita index revealed 49.3 ectopic pregnancy-specific publications per 1000 USD GDP per capita for the US in contrast to 17.31 for the UK. Semi-qualitative indices such as country-specific citation rates ranked Switzerland first (24.7 citations per ectopic pregnancy-

specific publication), followed by the Scandinavian countries Finland and Sweden. Low-income countries did not exhibit significant research activities.

Conclusions: This is the first in-depth analysis of global ectopic pregnancy research since 1900. It offers unique insights into the global scientific landscape. Besides the US and the UK, Scandinavian countries and Switzerland can also be regarded as leading nations with regard to their relative socioeconomic input.

### KEY MESSAGE

This is the first in-depth analysis of global ectopic pregnancy research since 1900. It offers unique insights into global landscape that reveals that next to the US or the UK, also Scandinavian countries and Switzerland can be regarded as leading nations with regard to their relative socioeconomic input.

### KEY WORDS

ectopic pregnancy; density equalizing mapping; female health; reproduction biology

### STRENGTH AND LIMITATIONS

- We compiled the first concise depiction of the worldwide scientific productivity related to ectopic pregnancies.
- The NewQIS platform was used to evaluate the scientific output regarding quantitative and qualitative aspects, geographical and chronological developments, existing research networks and socio-economic benchmarks.

1  
2  
3 The method combines scientometric methods and “density equalizing  
4 mapping projections in a reliable and standardized way.  
5  
6

- 7 • The WoS focuses on English journals. It is a weakness that non-English  
8 articles are underrepresented in our analysis.  
9
- 10 • We analysed citation-based parameters, which rather reflect the recognition of  
11 the research in the scientific community than truly measure quality.  
12  
13  
14  
15  
16  
17  
18  
19  
20  
21  
22  
23  
24  
25  
26  
27  
28  
29  
30  
31  
32  
33  
34  
35  
36  
37  
38  
39  
40  
41  
42  
43  
44  
45  
46  
47  
48  
49  
50  
51  
52  
53  
54  
55  
56  
57  
58  
59  
60

## INTRODUCTION

1  
2  
3  
4  
5  
6  
7  
8  
9  
10  
11  
12  
13  
14  
15  
16  
17  
18  
19  
20  
21  
22  
23  
24  
25  
26  
27  
28  
29  
30  
31  
32  
33  
34  
35  
36  
37  
38  
39  
40  
41  
42  
43  
44  
45  
46  
47  
48  
49  
50  
51  
52  
53  
54  
55  
56  
57  
58  
59  
60

Around 2% of zygotes implant outside the uterine lining and form an ectopic gestation<sup>1</sup>. Frequently, the products of conception grow in the fallopian tube. Other implantation sites are the ovaries or the cervix. Affected patients may face significant morbidity or even mortality<sup>1</sup>. During the last decades, transvaginal ultrasound and beta-human chorionic gonadotropin (beta-HCG) levels became part of the clinical routine<sup>2-6</sup> leading to the timely detection of ectopic pregnancies and better patient outcomes<sup>7-9</sup>. First scientific publications describing therapeutic measures for ectopic pregnancies date back to the 16<sup>th</sup> century. Since then, thousands of studies tackled the most pressing questions in the field<sup>1, 10-12</sup>. Numerous discoveries improved diagnosis and management, and shaped the clinical guidelines we are using today<sup>13</sup>. Despite these hallmark advances in clinical care, ectopic pregnancies pose a significant burden on million women around the globe: In the United States of America (US) alone, costs related to the condition were estimated at around \$1 billion in 1990<sup>14</sup>. Although the mortality associated with ectopic gestations was halved in industrialized countries since the 1980s<sup>15</sup>, the condition constitutes a major cause of death continents like Asia and Africa<sup>16</sup>.

A multitude of disciplines such as OB/GYN, Family Medicine, Internal Medicine and Surgery are involved in the management of ectopic pregnancies. Hence, related research attracts the interest of scientists worldwide addressing the issue from a clinical, basic science and Public Health perspective. To carry out research according to identified shortcomings, establish global networks and allocate funds, scientists and funding institutions have to be aware of the global scientific landscape related to ectopic pregnancy research. Thus, this study provides a first comprehensive assessment of the research performance in the field and identifies trends in the

1  
2  
3 related literature by a scientometric approach<sup>17, 18</sup>. Therefor we identified all ectopic  
4 pregnancy-related publications indexed in the Web of Science until 2012. These  
5 items were (1) analysed in reference to their content and citations describing  
6 geographical and historical developments, (2) research networks were identified and  
7 (3) the country-specific productivity was related to socioeconomic variables.  
8 Furthermore, we present the most cited publications related to ectopic pregnancies.  
9 These studies cover key discoveries in the field and provide the scientific fundament  
10 for many clinical decisions made daily around the globe.  
11  
12  
13  
14  
15  
16  
17  
18  
19  
20  
21  
22  
23

## 24 **MATERIALS AND METHODS**

### 25 **NewQIS study protocol**

26  
27  
28 We employed the 'New Quality and Quantity Indices in Science' (NewQIS) platform  
29 to assess global ectopic pregnancy research in a standardized, reliable and objective  
30 way<sup>17, 18</sup>. This tool combines scientometric techniques to assess scientific  
31 productivity and density equalizing mapping<sup>19</sup> to generate global maps according to  
32 analysed parameters<sup>20-23</sup>.  
33  
34  
35  
36  
37  
38  
39  
40  
41  
42  
43  
44  
45  
46  
47  
48  
49  
50  
51  
52  
53  
54  
55  
56  
57  
58  
59  
60

### **Data source**

The database Web of Science (WoS, Thomson Scientific) was used to conduct this  
study. We selected this data source because it allows the assessment of publication  
activity similar to the PubMed database, but facilitates a thorough citation analysis for  
the research in focus<sup>24, 25</sup>.



## Search strategy

The following search term was used: “*ectopic pregnanc\**” OR “*ovarian pregnanc\**” OR “*cervical pregnanc\**” OR “*tubal pregnanc\**” OR “*abdominal pregnanc\**” OR “*extrauterine pregnanc\**” OR “*ectopic gestation\**” OR “*ovarian gestation\**” OR “*cervical gestation\**” OR “*tubal gestation\**” OR “*abdominal gestation\**” OR “*extrauterine gestation\**”. We performed a “Topic” search, and the term was inserted into the WoS search fields “title”, “abstract” and “key words” to identify the total number of published items related to ectopic pregnancies.

## Timeframe

The analysed timeframe for research on ectopic pregnancy encompassed the years between 1900 (01-01) and 2012 (31-12). Results from 2013 onwards were not considered due to incomplete data acquisition (i.e. citation rate) at the time the study was performed.

## Data analysis and categorization

Metadata were retrieved in Plain Text Format (S1 File) as described in previously published NewQIS studies<sup>26, 27</sup>. Bibliometric details were analysed with respect to quantitative and semi-qualitative aspects such as originating countries, languages, citations, cited references, year published and subject categories. Subject categories are assigned to every journal and its publications by the Journal Citation Reports (provided by the Institute of Scientific Information) and can be retrieved via WoS. As semi-qualitative items describing the recognition of publications by the scientific

1  
2  
3 community, the number of citations, citation rates and the modified H-Indices (HI)  
4  
5 were investigated, as previously described <sup>28</sup>. Therefore the citation numbers were  
6  
7 retrieved for each publication and the average citations per item (citation rate) were  
8  
9 calculated. Regression analysis was used to investigate the timely evolution of  
10  
11 ectopic pregnancy research.  
12  
13

14  
15 After the transformation of the raw data to excel program charts and analysis, the  
16  
17 findings were illustrated in numerous diagrams and visualized by the use of density-  
18  
19 equalizing mapping projections (DEMP). The algorithm for this procedure was  
20  
21 published by Gastner and Newman <sup>19</sup>. In DEMPs, the territories of the different  
22  
23 countries were resized in proportion to our selected variables such the distribution of  
24  
25 country-specific numbers of published items, average citation rates and H-Indices.  
26  
27  
28  
29  
30  
31

### 32 **Socioeconomic analysis**

33  
34

35 In order to assess research output with regard to the economic power of the most  
36  
37 active countries, the publication activity was related to the Gross Domestic Product  
38  
39 (GDP) and the GDP per capita in current USD, as described earlier <sup>29</sup>. According to  
40  
41 the World Bank, the GDP at purchaser's prices is the sum of gross value added by all  
42  
43 resident producers in the economy plus any product taxes and minus any subsidies  
44  
45 not included in the value of the products. It is calculated without making deductions  
46  
47 for depreciation of fabricated assets or for depletion and degradation of natural  
48  
49 resources. Data are in current U.S. dollars. Dollar figures for GDP are converted from  
50  
51 domestic currencies using single year official exchange rates. For a few countries  
52  
53 where the official exchange rate does not reflect the rate effectively applied to actual  
54  
55  
56  
57  
58  
59  
60

1  
2  
3 foreign exchange transactions, an alternative conversion factor is used  
4  
5 (<http://data.worldbank.org/indicator/NY.GDP.MKTP.CD>).  
6  
7

8 The GDP per capita is defined as gross domestic product divided by midyear  
9  
10 population. GDP is the sum of gross value added by all resident producers in the  
11  
12 economy plus any product taxes and minus any subsidies not included in the value of  
13  
14 the products. It is calculated without making deductions for depreciation of fabricated  
15  
16 assets or for depletion and degradation of natural resources. Data are in current U.S.  
17  
18 dollars (<http://data.worldbank.org/indicator/NY.GDP.PCAP.CD>).  
19  
20  
21  
22  
23  
24

## 25 **Analysis of international ectopic pregnancy research collaborations**

26  
27  
28 To investigate international research collaborations, the affiliations of all identified  
29  
30 ectopic pregnancy-related publications were screened as described earlier<sup>30, 31</sup>. In  
31  
32 brief, if at least two authors, who were working in different countries, contributed to  
33  
34 one ectopic pregnancy-related publication, this relationship was defined as a  
35  
36 collaborative publication. To visualize the productivity of collaborations for each pair  
37  
38 of countries, a vector was calculated. Its line width and shade of grey is proportional  
39  
40 to the number of depicted collaborations<sup>24, 32</sup>.  
41  
42  
43  
44  
45  
46  
47

## 48 **RESULTS**

### 49 **Global ectopic pregnancy research activity**

50  
51  
52 We identified 8,040 ectopic pregnancy-related publications issued from 1900 to 2012;  
53  
54 these were cited 86,680 times. 92.4% of these items were written in English and  
55  
56 published by researchers from 76 different countries. US-American researchers  
57  
58  
59  
60

1  
2  
3 authored 2612 publications accounting for 32% of all ectopic pregnancy-related  
4  
5 publications. The US was identified as the country with the highest number of  
6  
7 publications worldwide (Fig 1A). The United Kingdom (UK) was positioned second  
8  
9 with 723 ectopic pregnancy publications, followed by Germany (370 publications),  
10  
11 France (366 publications), Israel (248 publications), Canada (215 publications),  
12  
13 Australia (203 publications), Italy (179 publications), Japan (169 publications), Turkey  
14  
15 (162 publications), China (159 publications), Sweden (151 publications), the  
16  
17 Netherlands (134 publications), Austria (124 publications) and Taiwan (122  
18  
19 publications). Since North America, Western Europe and Australia were responsible  
20  
21 for the majority of research output associated with “ectopic pregnancy”, their country  
22  
23 sizes appear inflated in the DEMP-analysis (Fig 1A). Major parts of Asia (except  
24  
25 China and Taiwan), Russia, Africa and South America occupied only small areas on  
26  
27 the cartogram. The analysis of the timely evolution led to a regression coefficient of  
28  
29 0.6793 for the period from 1900 until 2012 and of 0.8105 for the period from 1970  
30  
31 until 2012 (Fig 1B). This indicated a strong increase of global research activity in the  
32  
33 past 40 years.  
34  
35  
36  
37  
38  
39  
40  
41  
42

### 43 **Socioeconomic analysis of ectopic pregnancy research**

44  
45 In order to assess the relative magnitude of the countries research activities in  
46  
47 relation to their economic wealth, the two indicators GDP and GDP per capita were  
48  
49 used for our evaluation. The analysis of publication activity in relation to the most  
50  
51 productive countries' GDP demonstrated that Israel published the highest amount of  
52  
53 ectopic pregnancy-specific research relative to its GDP: 853.41 publications per 1000  
54  
55 bn USD GDP. It was followed by the UK with 269.97 ectopic pregnancy-specific  
56  
57  
58  
59  
60

publications per 1000 bn USD GDP, Turkey (196.79 publications per 1000 bn USD GDP) and the US (155.77 publications per 1000 bn USD GDP) (Table 1).

When the ectopic pregnancy publication activity was related to the GDP per capita, the US again gained the leading position with a level of 49.3 ectopic pregnancy specific publications per 1000 USD GDP per capita. This benchmarking largely resembled the total publication activity analysis with the exception of Turkey, which climbed from tenth to third position due to its extremely low GDP per capita (Table 1).

**Table 1. Socio-economic analysis of ectopic pregnancy research of the ten most active countries.** Sources for GDP and GDP per capita in 2013:

<http://data.worldbank.org/indicator/NY.GDP.PCAP.CD>

| Country        | Number of publications | GDP in 1000 bn US-\$ | Publications / GDP in 1000 bn US-\$ | GDP per capita in 1000 US-\$ | Publ. / GDP per Capita in 1000 US-\$ |
|----------------|------------------------|----------------------|-------------------------------------|------------------------------|--------------------------------------|
| Israel         | 248 (5)                | 0.2906 (10)          | 853.41 (1)                          | 36.05 (8)                    | 6.88 (6)                             |
| United Kingdom | 723 (2)                | 2.6781 (5)           | 269.97 (2)                          | 41.78 (6)                    | 17.31 (2)                            |
| Turkey         | 162 (10)               | 0.8232 (9)           | 196.79 (3)                          | 10.99 (10)                   | 14.75 (3)                            |
| United States  | 2612 (1)               | 16.7681 (1)          | 155.77 (4)                          | 52.98 (2)                    | 49.30 (1)                            |
| France         | 366 (4)                | 2.8102 (4)           | 130.24 (5)                          | 42.63 (5)                    | 8.59 (4)                             |
| Australia      | 203 (7)                | 1.5604 (8)           | 130.09 (6)                          | 67.47 (1)                    | 3.01 (10)                            |
| Canada         | 215 (6)                | 1.8389 (7)           | 116.92 (7)                          | 52.31 (3)                    | 4.11 (9)                             |
| Germany        | 370 (3)                | 3.7303 (3)           | 99.19 (8)                           | 46.26 (4)                    | 8.00 (5)                             |
| Italy          | 179 (8)                | 2.1369 (6)           | 83.77 (9)                           | 35.48 (9)                    | 5.05 (7)                             |
| Japan          | 169 (9)                | 4.9195 (2)           | 34.35 (10)                          | 38.63 (7)                    | 4.37 (8)                             |

## Global citation analysis

Citation analysis of all country-specific publications demonstrated a leading position of the US. US-American publications dedicated to ectopic pregnancy research received a total of 39,404 citations (Fig. 2A). It was followed by the UK with over 8,000 citations, France (4,423 citations), Canada (3,578 citations), Israel (3,057 citations) and Sweden (3,349 citations). DEMP analysis regarding the citation activity was similar to the cartogram reflecting absolute publication numbers: The map represents nearly no citations for African, South American or Asian countries leading to a minimized appearance of these areas whereas North America and Europe are depicted increased in size (Fig 2A).

The calculation of the country-specific H-Index (Fig 2B) showed a leading position of the US with 80 ectopic pregnancy-related publications being cited at least 80 times. The US was followed by the UK with a country-specific H-Index of 42, Canada (H-Index: 36), France (H-Index: 35), Israel (H-Index: 31), Sweden (H-Index: 30), Finland (H-Index: 29), the Netherlands (H-Index: 29), Belgium (H-Index: 25) and Germany (H-Index: 25). Again, countries from Africa, Eastern Europe, Latin America or Russia exhibited very low rates.

The results of the country-specific citation rate (Fig 2C) contrasted all other benchmarks since Switzerland ranked first with a citation rate (CR) of 24.7, followed by the Scandinavian countries Finland and Sweden with CR of 20.9 and 20.2, respectively.

### Cooperation articles

Out of the 8,040 ectopic pregnancy-related publications, only 397 were published within international collaborations. This equates a relatively small percentage of 4.9%. With 82.1% (326 publications), bilateral collaborations were the most common type of established collaborative efforts, followed by trilateral (51) co-operations. The US was the leading country with 156 collaborations followed by the UK with 127 international relationships. The most frequent bilateral collaboration was set up between the UK and Belgium with 37 joint studies. Interestingly, 51 out of the 111 total studies from Belgium arose from international collaborations, which equals a percentage of 45.9% (Fig 3A). In comparison, the US was characterized by a ratio of 156 collaborative publications out of 2,612 (6%), the UK by 17.6% and Germany by 10.3%. A continuous increase in the numbers of collaborations was present until 2010 with 34 collaborative publications in this year (Fig 3B).

### Subject area analysis

The timely evolution in subject categories of ectopic pregnancy-related publications was analysed since 1973 and the proportion of the different subject areas was investigated (Fig 4A). Articles can be assigned to more than one category, hence percentages of more than 100 were possible. From the beginning until 2012, "Obstetrics & Gynecology" remained the most prominent category. "Reproductive Biology" gained importance after 1988. The field diversified in 1978 when research was also published in the categories of "Emergency Medicine" (since 1978) and "Pathology" (since 1983). Overall, the percentages of all assigned subject categories remained relatively constant with no rapid increase of one particular area within the

1  
2  
3 past 20 years. A small but constant proportion of publications was attributed to the  
4  
5 area of “Public, Environmental & Occupational Health”, which indicates that scientists  
6  
7 also focused upon Public Health issues related to ectopic pregnancy.  
8  
9

10 We identified the leading, most impactful publication categories based on item and  
11  
12 citation count (Fig 4B). The primary areas of ectopic pregnancy-research were  
13  
14 “Obstetrics & Gynecology” and “Reproductive Biology”. The 5,100 publications  
15  
16 assigned to “Obstetrics & Gynecology” were cited 57,879 times. “Reproductive  
17  
18 Biology” with 1,496 publications was cited 22,545 times. When citation rates were  
19  
20 analysed, the highest rate was present for the subject area “Infectious Diseases” with  
21  
22 24.02 citations per ectopic pregnancy-related publication. The frequently assigned  
23  
24 subject areas “Reproductive Biology” and “Obstetrics & Gynecology” were  
25  
26 characterized by citation rates of 15.07 and 11.37 respectively.  
27  
28  
29  
30  
31  
32  
33  
34  
35  
36  
37  
38  
39  
40  
41  
42  
43  
44  
45  
46  
47  
48  
49  
50  
51  
52  
53  
54  
55  
56  
57  
58  
59  
60



We performed a subject area analysis for the most productive countries aiming to pinpoint the particular focus researchers are working on in these nations: In France, a high volume of “Public Health”-related work was published. This finding underlines the nation’s interest to allocate considerable resources to Public Health issues in context with ectopic pregnancies. A relatively high percentage of Public Health-related ectopic pregnancy research originated from the US when compared to other countries, e.g. Japan. Also, US-American scientists focused more on emergency medicine aspects of ectopic pregnancy research than researchers from all other countries. This is reflected by a high percentage of allocated publications originating from the US to that category (Fig 5). Also, we identified the key publications in the field of ectopic pregnancy research, which were cited 200 times or more.

**Table 2. Key publications in the field of ectopic pregnancy research.** These articles were published since 1900 and cited 200 times or more.

| Title                                                                                                         | Publication Year | Country                                      | Citations | Journal             |
|---------------------------------------------------------------------------------------------------------------|------------------|----------------------------------------------|-----------|---------------------|
| WHO analysis of causes of maternal death: a systematic review<br><i>Khan KS et al.</i> <sup>33</sup>          | 2006             | Switzerland,<br>United Kingdom,<br>Argentina | 534       | LANCET              |
| Comparative genomes of Chlamydia pneumoniae and C-trachomatis<br><i>Kalman S et al.</i> <sup>34</sup>         | 1999             | United States                                | 457       | NAT GENET           |
| Pelvic inflammatory disease and fertility<br><i>Westström L et al.</i> <sup>35</sup>                          | 1992             | United States                                | 347       | SEX TRANSM DIS      |
| Genital chlamydial infections - epidemiology and reproductive sequelae<br><i>Cates W et al.</i> <sup>36</sup> | 1991             | United States                                | 345       | AM J OBSTET GYNECOL |
| Current methods of laboratory diagnosis of Chlamydia                                                          | 1997             | United States                                | 293       | CLIN MICROBIOL      |

|    |                                              |      |                         |     |               |
|----|----------------------------------------------|------|-------------------------|-----|---------------|
| 1  | trachomatis infections                       |      |                         |     | REV           |
| 2  | <i>Black CM et al.</i> <sup>37</sup>         |      |                         |     |               |
| 3  | Prevalence of chlamydial and                 |      |                         |     |               |
| 4  | gonococcal infections among                  |      |                         |     |               |
| 5  | young adults in the                          |      |                         |     |               |
| 6  | United States                                |      |                         |     | JAMA-J AM     |
| 7  | <i>Miller WC et al.</i> <sup>38</sup>        | 2004 | United States           | 270 | MED ASSN      |
| 8  | The epidemiology of smoking                  |      |                         |     |               |
| 9  | during pregnancy                             |      |                         |     |               |
| 10 | <i>Cnattingius S</i> <sup>39</sup>           | 2004 | Sweden                  | 250 | NICOTINE TOB  |
| 11 | Single-dose methotrexate - an                |      |                         |     |               |
| 12 | expanded clinical-trial                      |      |                         |     |               |
| 13 | <i>Stovall TG and Ling FW</i> <sup>40</sup>  | 1993 | United States           | 238 | AM J OBSTET   |
| 14 | A method of screening for                    |      |                         |     |               |
| 15 | ectopic pregnancy and its                    |      |                         |     |               |
| 16 | indications                                  |      |                         |     |               |
| 17 | <i>Kadar N et al.</i> <sup>41</sup>          | 1981 | United States           | 235 | OBSTET        |
| 18 | Maternal age and fetal loss:                 |      |                         |     |               |
| 19 | population based register                    |      |                         |     |               |
| 20 | Linkage study                                |      |                         |     |               |
| 21 | <i>Nybo Andersen AM et al.</i> <sup>42</sup> | 2000 | Denmark                 | 234 | BRIT MED J    |
| 22 | Treatment of interstitial ectopic            |      |                         |     |               |
| 23 | pregnancy with methotrexate -                |      |                         |     |               |
| 24 | report of a successful case                  |      |                         |     |               |
| 25 | <i>Tanaka T et al.</i> <sup>43</sup>         | 1982 | Japan                   | 233 | FERTIL STERIL |
| 26 | Discriminatory HCG zone - its                |      |                         |     |               |
| 27 | use in the sonographic                       |      |                         |     |               |
| 28 | evaluation for ectopic pregnancy             |      |                         |     |               |
| 29 | <i>Kadar N et al.</i> <sup>44</sup>          | 1981 | United States<br>France | 229 | OBSTET        |
| 30 | Conservative laparoscopic                    |      |                         |     |               |
| 31 | treatment of 321 ectopic                     |      |                         |     |               |
| 32 | pregnancies                                  |      |                         |     |               |
| 33 | <i>Pouly JL et al.</i> <sup>45</sup>         | 1986 | France                  | 228 | FERTIL STERIL |
| 34 | Incidence, trends, and risks of              |      |                         |     |               |
| 35 | ectopic pregnancy in a                       |      |                         |     |               |
| 36 | population of woman                          |      |                         |     |               |
| 37 | <i>Westström L et al.</i> <sup>46</sup>      | 1981 | Sweden                  | 214 | BRIT MED J    |
| 38 | Early termination of pregnancy               |      |                         |     |               |
| 39 | with mifepristone (RU-486) and               |      |                         |     |               |
| 40 | the orally active prostaglandin              |      |                         |     |               |
| 41 | misoprostol                                  |      |                         |     |               |
| 42 | <i>Peyron R et al.</i> <sup>47</sup>         | 1993 | France                  | 216 | N ENGL J MED  |

## DISCUSSION

1  
2  
3 Accounting for a percentage of 2% of all first-trimester pregnancies in the US,  
4 ectopic gestation is a very common complication of pregnancy. It should therefore  
5 merit a high degree of interest within the scientific community. Hence, this NewQIS  
6 study<sup>17, 18</sup> is focused on this condition and presents the first multifaceted analysis of  
7 the related global research architecture using density equalizing mapping analysis  
8 tools<sup>19</sup>. Additionally, we selected 15 publications that were defined as key articles in  
9 the field based on 200 and more citations. These key publications provide relevant  
10 background information for individual scholarship, practice and research endeavours.  
11  
12  
13  
14  
15  
16  
17  
18  
19

20  
21  
22  
23  
24 In total, we analysed 8,040 publications related to ectopic pregnancies. The US was  
25 identified as the country dominating the field. With regard to total publishing activities,  
26 it is important to compare ectopic pregnancy research to other disease entities or to  
27 the field of OB/GYN in general: A recent study by Alexandre-Benavent et al. focused  
28 on trends in reproductive medicine research over a period of 10 years<sup>48</sup>. It was the  
29 authors' objective to study the publication activity metrics from 2003 to 2012 and to  
30 shed a light on the clinical, social, and epidemiologic implications of this relatively  
31 new but rapidly emerging field. As outcome measures, they analysed most  
32 productive and frequently cited investigators, institutions, and countries as well as  
33 specific areas of research and scientific collaborations. The authors found that 90  
34 investigators with more than 1,000 citations had jointly published 4,010 articles. The  
35 most-cited study groups were located in the Netherlands, Belgium, Spain, the US,  
36 and the UK, and collaborative studies have been increasing. It was concluded that  
37 reproductive medicine research has attained scientific interest and importance. Also,  
38 the increase in (inter)national collaborations seems to be the key to the field's  
39 success. In contrast to Alexandre-Benavent et al., we focused on a single disease  
40  
41  
42  
43  
44  
45  
46  
47  
48  
49  
50  
51  
52  
53  
54  
55  
56  
57  
58  
59  
60

1  
2  
3 entity and encompassed more than one hundred years of research. Besides  
4  
5 monitoring the scientific output we also related the numbers to the economic power  
6  
7 of investigated countries in order to dissect the real interest of single nations in  
8  
9 research related to a particular condition. Therefore, we related the ectopic  
10  
11 pregnancy-related research activities to the total GDP and the GDP per capita. We  
12  
13 found that the US still dominated when GDP per capita index was used. However,  
14  
15 when related to the total GDP index, Israel exhibited the highest contribution of  
16  
17 ectopic pregnancy research in relation to its overall economic power.  
18  
19

20  
21 We compared the present data to other OBGYN entities such as polycystic ovary  
22  
23 syndrome (PCOS) or ovarian cancer <sup>49, 50</sup>: A published study on PCOS that covered  
24  
25 the years between 1900 and 2014 reported a total of 6261 PCOS-specific  
26  
27 publications and 703 international research collaborations in the Web of Science. As  
28  
29 in the present study, the USA was identified as the most active country in total and  
30  
31 collaborative research activity <sup>49</sup>. In the socioeconomic analysis, the USA was also  
32  
33 ranked first concerning PCOS-related publications per gross domestic product,  
34  
35 followed by the UK, Italy and Greece <sup>49</sup>. For ovarian cancer research 23,378 reports  
36  
37 were identified for the period 1900 - 2014. Denmark was positioned at the first place  
38  
39 with a total of 1293.2 calculated ovarian cancer-specific articles per 1000 billion US-\$  
40  
41 GDP <sup>50</sup>. Other gynecological topics, which have been screened for scientific  
42  
43 productivity, were predominantly related to breast cancer <sup>51-54</sup>: Glynn et al. presented  
44  
45 an in-depth evaluation of breast cancer research. The authors screened publications  
46  
47 from 1945 to 2008 also using the NewQIS platform <sup>54</sup>. They identified 180,126 breast  
48  
49 cancer-associated items; these had been cited 4,136,224 times. In comparison to our  
50  
51 data on ectopic pregnancies encompassing a time span of 112 years, breast cancer  
52  
53 research has produced a more than 20 times greater scientific output in a period of  
54  
55  
56  
57  
58  
59  
60

1  
2  
3 slightly over 60 years. One reason for this discrepancy is that breast cancer accounts  
4  
5 for the most common malignancy among women, with an estimated 231,840 new  
6  
7 cases diagnosed in the US in 2015 alone <sup>55</sup>. Hence, this disease receives large  
8  
9 amounts of public awareness. Also, significant volumes of scientific resources are  
10  
11 allocated to support research in this area. In breast cancer, the US produced the  
12  
13 greatest publication output (n = 77,101; 42.8%), followed by the UK (n = 18,357;  
14  
15 10.2%) and Germany (n = 12,529, 7%) <sup>54</sup>. This ranking of the most productive  
16  
17 nations was similar to ectopic pregnancy research with 32.5% ectopic pregnancy-  
18  
19 related publications originating from the US, around 9% from the UK and 4.6% from  
20  
21 Germany. The percentage of total global research activity exhibited by US-American  
22  
23 institutions is higher in breast cancer research than in ectopic pregnancy research.  
24  
25  
26

27  
28 “Smoking in pregnancy” is another area of OB/GYN research that was studied <sup>56</sup>.  
29  
30 Here, 10,043 related publications were identified in a period from 1900 to 2012. As in  
31  
32 our investigation and the presented breast cancer study, the highest number of  
33  
34 scientific works was published by the US (35.5%), followed by the UK (9.9%). For  
35  
36 both countries, we documented similar percentage values and the highest modified  
37  
38 H-Indices of 128 (US) and 42 (UK) for ectopic pregnancy research activities. When  
39  
40 citation performance is compared, it is evident that research in “smoking and  
41  
42 pregnancy” receives a higher attention in the scientific community than scientific  
43  
44 endeavours related to “ectopic pregnancy” since the 10,043 publications in the field  
45  
46 of “smoking and pregnancy” were cited 112,136 times (11.2 citations per publication)  
47  
48 versus 8,040 ectopic pregnancy-related publications that received 86,680 citations  
49  
50 (10.8 citations per publication).  
51  
52  
53

54  
55  
56 When the global research activity regarding ectopic pregnancy is compared to other  
57  
58 biomedical fields, it can be stated that the observed dominance of the US is also  
59  
60

1  
2  
3 common in other, non-OB/GYN medical specialties. In a study that analysed  
4  
5 5,527,558 published items authored in all areas of medicine over the last 50 years,  
6  
7 the following ranking of total research activity was found <sup>57</sup>: The US was the leading  
8  
9 nation, followed by Japan, Germany, the UK, France, and Italy <sup>57</sup>. In our analysis, it  
10  
11 can be clearly stated that Japan does not exhibit comparable activities in the field of  
12  
13 ectopic pregnancy research with only 169 publications in the present set of data. This  
14  
15 finding could be linked to a lower prevalence of ectopic pregnancies in Japan  
16  
17 compared with other nations translating into disregard of the topic among local  
18  
19 scientists and funding institutions. However, epidemiological data on the exact rates  
20  
21 of ectopic pregnancies or pelvic inflammatory disease in Japan are lacking. Also,  
22  
23 data on maternal mortality attributed to ectopic pregnancies are sparse. For the early  
24  
25 nineties, ectopic pregnancy-related maternal mortality was reported at 4% in Japan  
26  
27 compared to 13% in the US (data collected until 1989) <sup>58, 59</sup>. Since this difference  
28  
29 could indeed reflect a lower impact of ectopic pregnancies on the public health of  
30  
31 Japanese women, this fact may explain a lacking interest of Japanese institutions to  
32  
33 foster research on this topic.  
34  
35  
36  
37  
38

39 We identified a small number of international collaborations in the field of ectopic  
40  
41 pregnancy research. The rate of 4.9% is substantially lower than in other fields.  
42  
43 Additionally, we documented a very small number of ectopic pregnancy-related  
44  
45 publications investigating Public Health aspects. These findings indicate a low  
46  
47 awareness of this subject matter in terms of ectopic pregnancy research, which is  
48  
49 contrasting the major disease burden this condition poses on women - especially in  
50  
51 low-income countries with high rates of pelvic inflammatory diseases and only limited  
52  
53 access to diagnostic and treatment procedures. Therefore, future research should  
54  
55 pay attention to these problematic issues and focus on fostering collaborative efforts,  
56  
57  
58  
59  
60

1  
2  
3 involving developing countries in research networks and conducting projects in the  
4  
5 field of Public Health.  
6  
7  
8  
9

## 10 **CONCLUSIONS**

14 The present study is the first combined economic and scientometric study that  
15 depicts a sketch of the global research activities on ectopic pregnancies. With regard  
16 to other disease entities, it can be stated that a mere total of about 8000 related  
17 publications highlights the need to foster research programs on this problematic  
18 condition that endangers female health and human reproduction biology all around  
19 the globe. The lack of research productivity in low-income countries and their missing  
20 presence in international collaborations also exemplifies the need for Public Health  
21 approaches to help women in these parts of the world.  
22  
23  
24  
25  
26  
27  
28  
29  
30  
31  
32  
33  
34  
35  
36  
37  
38  
39  
40  
41  
42  
43  
44  
45  
46  
47  
48  
49  
50  
51  
52  
53  
54  
55  
56  
57  
58  
59  
60

## ACKNOWLEDGEMENTS

We thank G Volante for expert editorial help. This study is part of a thesis project (JK).

## AUTHORS' CONTRIBUTIONS

DB, JK, DQ, MHB, DK, FL, JJ, and DAG have made substantial contributions to the conception and design of the study, acquisition of the data and interpretation. They have been involved in drafting and revising the manuscript. All authors have read and approved the final manuscript.

## CONFLICT OF INTEREST

The authors declare that they have no conflict of interest.

## FUNDING

We did not receive any funding to conduct this study.

## SUPPORTING INFORMATAION

**S1 File. Raw data used in analysis.** For our study, metadata were retrieved in Plain Text Format to establish an interim database, which was used to sort and analyse bibliometric data in regards to variables of interest.



## FIGURE LEGENDS

**Fig 1. Publication output.** A) Global Density-equalizing mapping of ectopic pregnancy publications. The area of each country is scaled in proportion to its total number of ectopic pregnancy-related publications. Colours encode numbers of ectopic pregnancy publications. B) Timely evolution of ectopic pregnancy-related publications.

**Fig 2. Density-equalizing maps.** A) Density-equalizing map of country total citations of ectopic pregnancy-related publications. The area of each country was scaled in proportion to its total number of ectopic pregnancy-related citations. Colours encode numbers of ectopic pregnancy-related citations. B) Density-equalizing map of country specific H-Index of ectopic pregnancy-related publications. The area of each country was scaled in proportion to the countries' specific H-Index. C) Density-equalizing map of country specific citations per ectopic pregnancy-related publication. Colours encode ectopic pregnancy-related citation rate levels.

**Fig 3. International collaboration.** A) Net diagram of international ectopic pregnancy-related collaborations. Line width and grey scale encode numbers of ectopic pregnancy-related collaborations. Numbers in brackets indicate: (number of ectopic pregnancy-related publications of a specific country/number of ectopic pregnancy-related collaboration articles of a specific country). B) Timely evolution of number of ectopic pregnancy-related international collaborations per year.

**Fig 4. Subject area analysis.** A) Timely evolution of subject areas assigned to the ectopic pregnancy-related publications in 5-year periods. Proportion of the 10 most assigned subject areas in 5-year intervals in order to gain insights into the field activity. B) Citation analysis of the 10 most assigned subject areas of all ectopic pregnancy-related publications.

1  
2  
3 **Fig 5. Country-specific analysis of assigned subject categories.** Analysis was  
4  
5 performed of the 10 most active countries in ectopic pregnancy research in order to  
6  
7 identify regional differences in ectopic pregnancy research.  
8  
9  
10  
11  
12  
13  
14  
15  
16  
17  
18  
19  
20  
21  
22  
23  
24  
25  
26  
27  
28  
29  
30  
31  
32  
33  
34  
35  
36  
37  
38  
39  
40  
41  
42  
43  
44  
45  
46  
47  
48  
49  
50  
51  
52  
53  
54  
55  
56  
57  
58  
59  
60

For peer review only

## REFERENCES

1. Marion LL, Meeks GR. Ectopic pregnancy: History, incidence, epidemiology, and risk factors. *Clin Obstet Gynecol* 2012;**55**:376-86 doi: 10.1097/GRF.0b013e3182516d7b published Online First: 2012/04/19].
2. Kirk E, Bottomley C, Bourne T. Diagnosing ectopic pregnancy and current concepts in the management of pregnancy of unknown location. *Hum Reprod Update* 2014;**20**:250-61 doi: 10.1093/humupd/dmt047 published Online First: 2013/10/09].
3. Kao LY, Scheinfeld MH, Chernyak V, *et al.* Beyond ultrasound: CT and MRI of ectopic pregnancy. *AJR Am J Roentgenol* 2014;**202**:904-11 doi: 10.2214/ajr.13.10644 published Online First: 2014/03/26].
4. Orazulike NC, Konje JC. Diagnosis and management of ectopic pregnancy. *Womens Health (Lond Engl)* 2013;**9**:373-85 doi: 10.2217/whe.13.35 published Online First: 2013/07/06].
5. Alkatout I, Honemeyer U, Strauss A, *et al.* Clinical diagnosis and treatment of ectopic pregnancy. *Obstet Gynecol Surv* 2013;**68**:571-81 doi: 10.1097/OGX.0b013e31829cdebepublished Online First: 2013/08/08].
6. van Mello NM, Mol F, Ankum WM, *et al.* Ectopic pregnancy: how the diagnostic and therapeutic management has changed. *Fertil Steril* 2012;**98**:1066-73 doi: 10.1016/j.fertnstert.2012.09.040 published Online First: 2012/10/23].
7. Lermann J, Segl P, Jud SM, *et al.* Low-dose methotrexate treatment in ectopic pregnancy: a retrospective analysis of 164 ectopic pregnancies treated between 2000 and 2008. *Arch Gynecol Obstet* 2014;**289**:329-35 doi: 10.1007/s00404-013-2982-x published Online First: 2013/08/06].

- 1  
2  
3 8. Cecchino GN, Araujo Junior E, Elito Junior J. Methotrexate for ectopic pregnancy:  
4  
5 when and how. *Arch Gynecol Obstet* 2014;**290**:417-23 doi: 10.1007/s00404-  
6  
7 014-3266-9published Online First: 2014/05/06].  
8
- 9  
10 9. Hosni MM, Herath RP, Mumtaz R. Diagnostic and therapeutic dilemmas of cervical  
11  
12 ectopic pregnancy. *Obstet Gynecol Surv* 2014;**69**:261-76 doi:  
13  
14 10.1097/ogx.000000000000062published Online First: 2014/08/08].  
15
- 16 10. Visconti K, Zite N. hCG in ectopic pregnancy. *Clin Obstet Gynecol* 2012;**55**:410-7  
17  
18 doi: 10.1097/GRF.0b013e31825109dcpublished Online First: 2012/04/19].  
19
- 20 11. Rausch ME, Barnhart KT. Serum biomarkers for detecting ectopic pregnancy.  
21  
22 *Clin Obstet Gynecol* 2012;**55**:418-23 doi:  
23  
24 10.1097/GRF.0b013e31825109f6published Online First: 2012/04/19].  
25  
26
- 27 12. Casikar I, Reid S, Condous G. Ectopic pregnancy: Ultrasound diagnosis in  
28  
29 modern management. *Clin Obstet Gynecol* 2012;**55**:402-9 doi:  
30  
31 10.1097/GRF.0b013e31825109bdpublished Online First: 2012/04/19].  
32  
33
- 34 13. Hajenius PJ, Mol F, Mol BW, *et al.* Interventions for tubal ectopic pregnancy.  
35  
36 *Cochrane Database Syst Rev* 2007CD000324 doi:  
37  
38 10.1002/14651858.CD000324.pub2published Online First: 2007/01/27].  
39  
40
- 41 14. Washington AE, Katz P. Cost of and payment source for pelvic inflammatory  
42  
43 disease. Trends and projections, 1983 through 2000. *JAMA* 1991;**266**:2565-9  
44  
45 Online First: 1991/11/13].  
46
- 47 15. Creanga AA, Shapiro-Mendoza CK, Bish CL, *et al.* Trends in ectopic pregnancy  
48  
49 mortality in the United States: 1980-2007. *Obstet Gynecol* 2011;**117**:837-43  
50  
51 doi: 10.1097/AOG.0b013e3182113c10published Online First: 2011/03/23].  
52  
53
- 54 16. Der EM, Moyer C, Gyasi RK, *et al.* Pregnancy related causes of deaths in Ghana:  
55  
56 a 5-year retrospective study. *Ghana Med J* 2013;**47**:158-63 Online First:  
57  
58 2014/03/29].  
59  
60

- 1  
2  
3 17. Groneberg-Kloft B, Quarcoo D, Scutaru C. Quality and quantity indices in  
4  
5 science: use of visualization tools. *EMBO Rep* 2009;**10**:800-3 doi:  
6  
7 10.1038/embor.2009.162published Online First: 2009/08/04].  
8  
9  
10 18. Groneberg-Kloft B, Fischer TC, Quarcoo D, *et al*. New quality and quantity  
11  
12 indices in science (NewQIS): the study protocol of an international project. *J*  
13  
14 *Occup Med Toxicol* 2009;**4**:16 doi: 10.1186/1745-6673-4-16published Online  
15  
16 First: 2009/06/27].  
17  
18  
19 19. Gastner M, Newman M. From The Cover: Diffusion-based method for producing  
20  
21 density-equalizing maps. *Proceedings of the National Academy of Sciences of*  
22  
23 *the United States of America* 2004;**101**:7499 - 504 Online First.  
24  
25  
26 20. Groneberg DA, Rahimian S, Bundschuh M, *et al*. Telemedicine - a scientometric  
27  
28 and density equalizing analysis. *J Occup Med Toxicol* 2015;**10**:38 doi:  
29  
30 10.1186/s12995-015-0076-3published Online First: 2015/10/27].  
31  
32 21. Quarcoo D, Bruggmann D, Klingelhofer D, *et al*. Ebola and Its Global Research  
33  
34 Architecture--Need for an Improvement. *PLoS Negl Trop Dis*  
35  
36 2015;**9**:e0004083 doi: 10.1371/journal.pntd.0004083published Online First:  
37  
38 2015/09/26].  
39  
40  
41 22. Schreiber M, Klingelhofer D, Groneberg DA, *et al*. Patient safety: the landscape  
42  
43 of the global research output and gender distribution. *BMJ Open*  
44  
45 2016;**6**:e008322 doi: 10.1136/bmjopen-2015-008322published Online First:  
46  
47 2016/02/14].  
48  
49  
50 23. Groneberg DA, Weber E, Gerber A, *et al*. Density equalizing mapping of the  
51  
52 global tuberculosis research architecture. *Tuberculosis (Edinb)* 2015;**95**:515-  
53  
54 22 doi: 10.1016/j.tube.2015.05.003published Online First: 2015/06/03].  
55  
56  
57 24. Gerber A, Klingelhofer D, Groneberg DA, *et al*. Silicosis: geographic changes in  
58  
59 research: an analysis employing density-equalizing mapping. *J Occup Med*  
60

- 1  
2  
3 *Toxicol* 2014;**9**:2 doi: 10.1186/1745-6673-9-2published Online First:  
4  
5 2014/01/21].  
6  
7  
8 25. Gerber A, Groneberg DA, Klingelhofer D, *et al.* Gout: a critical analysis of  
9  
10 scientific development. *Rheumatol Int* 2013;**33**:2743-50 doi: 10.1007/s00296-  
11  
12 013-2805-1published Online First: 2013/06/26].  
13  
14 26. Bruggmann D, Handl V, Klingelhofer D, *et al.* Congenital toxoplasmosis: an in-  
15  
16 depth density-equalizing mapping analysis to explore its global research  
17  
18 architecture. *Parasit Vectors* 2015;**8**:646 doi: 10.1186/s13071-015-1263-  
19  
20 xpublished Online First: 2015/12/23].  
21  
22  
23 27. Pleger N, Kloft B, Quarcoo D, *et al.* Bacterial meningitis: a density-equalizing  
24  
25 mapping analysis of the global research architecture. *Int J Environ Res Public*  
26  
27 *Health* 2014;**11**:10202-14 doi: 10.3390/ijerph111010202published Online First:  
28  
29 2014/10/02].  
30  
31  
32 28. Bruggmann D, Maule LS, Klingelhofer D, *et al.* World-wide architecture of  
33  
34 osteoporosis research: density-equalizing mapping studies and gender  
35  
36 analysis. *Climacteric* 2016;**19**:463-70 doi:  
37  
38 10.1080/13697137.2016.1200548published Online First: 2016/06/30].  
39  
40  
41 29. Bruggmann D, Wagner C, Klingelhofer D, *et al.* Maternal depression research:  
42  
43 socioeconomic analysis and density-equalizing mapping of the global research  
44  
45 architecture. *Arch Womens Ment Health* 2017;**20**:25-37 doi: 10.1007/s00737-  
46  
47 016-0669-6published Online First: 2016/09/30].  
48  
49  
50 30. Bruggmann D, Elizabeth-Martinez A, Klingelhofer D, *et al.* Endometriosis and its  
51  
52 global research architecture: an in-depth density-equalizing mapping analysis.  
53  
54 *BMC Womens Health* 2016;**16**:64 doi: 10.1186/s12905-016-0336-0published  
55  
56 Online First: 2016/09/23].  
57  
58  
59  
60

- 1  
2  
3 31. Bruggmann D, Lohlein LK, Louwen F, *et al.* Caesarean Section--A Density-  
4  
5 Equalizing Mapping Study to Depict Its Global Research Architecture. *Int J*  
6  
7 *Environ Res Public Health* 2015;**12**:14690-708 doi:  
8  
9 10.3390/ijerph121114690published Online First: 2015/11/26].  
10  
11  
12 32. Bundschuh M, Groneberg DA, Klingelhofer D, *et al.* Yellow fever disease:  
13  
14 density equalizing mapping and gender analysis of international research  
15  
16 output. *Parasit Vectors* 2013;**6**:331 doi: 10.1186/1756-3305-6-331published  
17  
18 Online First: 2013/11/20].  
19  
20  
21 33. Khan KS, Wojdyla D, Say L, *et al.* WHO analysis of causes of maternal death: a  
22  
23 systematic review. *Lancet* 2006;**367**:1066-74 doi: 10.1016/s0140-  
24  
25 6736(06)68397-9published Online First: 2006/04/04].  
26  
27  
28 34. Kalman S, Mitchell W, Marathe R, *et al.* Comparative genomes of Chlamydia  
29  
30 pneumoniae and C. trachomatis. *Nat Genet* 1999;**21**:385-9 doi:  
31  
32 10.1038/7716published Online First: 1999/04/07].  
33  
34  
35 35. Westrom L, Joesoef R, Reynolds G, *et al.* Pelvic inflammatory disease and  
36  
37 fertility. A cohort study of 1,844 women with laparoscopically verified disease  
38  
39 and 657 control women with normal laparoscopic results. *Sex Transm Dis*  
40  
41 1992;**19**:185-92 Online First: 1992/07/01].  
42  
43  
44 36. Cates W, Jr., Wasserheit JN. Genital chlamydial infections: epidemiology and  
45  
46 reproductive sequelae. *Am J Obstet Gynecol* 1991;**164**:1771-81 Online First:  
47  
48 1991/06/01].  
49  
50  
51 37. Black CM. Current methods of laboratory diagnosis of Chlamydia trachomatis  
52  
53 infections. *Clin Microbiol Rev* 1997;**10**:160-84 Online First: 1997/01/01].  
54  
55  
56 38. Miller WC, Ford CA, Morris M, *et al.* Prevalence of chlamydial and gonococcal  
57  
58 infections among young adults in the United States. *JAMA* 2004;**291**:2229-36  
59  
60 doi: 10.1001/jama.291.18.2229published Online First: 2004/05/13].

- 1  
2  
3 39. Cnattingius S. The epidemiology of smoking during pregnancy: smoking  
4 prevalence, maternal characteristics, and pregnancy outcomes. *Nicotine Tob*  
5 *Res* 2004;**6 Suppl 2**:S125-40 doi: 10.1080/14622200410001669187published  
6  
7 Online First: 2004/06/19].  
8  
9  
10  
11 40. Stovall TG, Ling FW. Single-dose methotrexate: an expanded clinical trial. *Am J*  
12 *Obstet Gynecol* 1993;**168**:1759-62; discussion 62-5 Online First: 1993/06/01].  
13  
14 41. Kadar N, Caldwell BV, Romero R. A method of screening for ectopic pregnancy  
15 and its indications. *Obstet Gynecol* 1981;**58**:162-6 Online First: 1981/08/01].  
16  
17  
18 42. Nybo Andersen AM, Wohlfahrt J, Christens P, *et al*. Maternal age and fetal loss:  
19 population based register linkage study. *BMJ* 2000;**320**:1708-12 Online First:  
20 2000/06/23].  
21  
22  
23 43. Tanaka T, Hayashi H, Kutsuzawa T, *et al*. Treatment of interstitial ectopic  
24 pregnancy with methotrexate: report of a successful case. *Fertil Steril*  
25 1982;**37**:851-2 Online First: 1982/06/01].  
26  
27  
28 44. Kadar N, DeVore G, Romero R. Discriminatory hCG zone: its use in the  
29 sonographic evaluation for ectopic pregnancy. *Obstet Gynecol* 1981;**58**:156-  
30 61 Online First: 1981/08/01].  
31  
32  
33 45. Pouly JL, Mahnes H, Mage G, *et al*. Conservative laparoscopic treatment of 321  
34 ectopic pregnancies. *Fertil Steril* 1986;**46**:1093-7 Online First: 1986/12/01].  
35  
36  
37 46. Westrom L, Bengtsson LP, Mardh PA. Incidence, trends, and risks of ectopic  
38 pregnancy in a population of women. *Br Med J (Clin Res Ed)* 1981;**282**:15-8  
39 Online First: 1981/01/03].  
40  
41  
42 47. Peyron R, Aubeny E, Targosz V, *et al*. Early termination of pregnancy with  
43 mifepristone (RU 486) and the orally active prostaglandin misoprostol. *N Engl*  
44 *J Med* 1993;**328**:1509-13 doi: 10.1056/nejm199305273282101published  
45  
46  
47 Online First: 1993/05/27].  
48  
49  
50  
51  
52  
53  
54  
55  
56  
57  
58  
59  
60



- 1  
2  
3 48. Aleixandre-Benavent R, Simon C, Fauser BC. Trends in clinical reproductive  
4  
5 medicine research: 10 years of growth. *Fertil Steril* 2015;**104**:131-7 e5 doi:  
6  
7 10.1016/j.fertnstert.2015.03.025published Online First: 2015/05/06].  
8  
9  
10 49. Bruggmann D, Berges L, Klingelhofer D, *et al.* Polycystic ovary syndrome:  
11  
12 analysis of the global research architecture using density equalizing mapping.  
13  
14 *Reprod Biomed Online* 2017 doi: 10.1016/j.rbmo.2017.03.010published Online  
15  
16 First: 2017/04/05].  
17  
18 50. Bruggmann D, Pulch K, Klingelhofer D, *et al.* Ovarian cancer: density equalizing  
19  
20 mapping of the global research architecture. *Int J Health Geogr* 2017;**16**:3 doi:  
21  
22 10.1186/s12942-016-0076-2published Online First: 2017/01/15].  
23  
24  
25 51. Kotepui M, Wannaiampikul S, Chupeerach C, *et al.* A bibliometric analysis of  
26  
27 diets and breast cancer research. *Asian Pac J Cancer Prev* 2014;**15**:7625-8  
28  
29 Online First: 2014/10/09].  
30  
31  
32 52. Moghimi M, Fathi M, Marashi A, *et al.* A scientometric analysis of 20 years of  
33  
34 research on breast reconstruction surgery: a guide for research design and  
35  
36 journal selection. *Arch Plast Surg* 2013;**40**:109-15 doi:  
37  
38 10.5999/aps.2013.40.2.109published Online First: 2013/03/28].  
39  
40  
41 53. Healy NA, Glynn RW, Scutaru C, *et al.* The h index and the identification of global  
42  
43 benchmarks for breast cancer research output. *Breast Cancer Res Treat*  
44  
45 2011;**127**:845-51 doi: 10.1007/s10549-011-1436-zpublished Online First:  
46  
47 2011/03/15].  
48  
49  
50 54. Glynn RW, Scutaru C, Kerin MJ, *et al.* Breast cancer research output, 1945-2008:  
51  
52 a bibliometric and density-equalizing analysis. *Breast Cancer Res*  
53  
54 2010;**12**:R108 doi: 10.1186/bcr2795published Online First: 2010/12/24].  
55  
56  
57  
58  
59  
60

- 1  
2  
3 55. Society AC. Cancer Facts & Figures 2015. Secondary Cancer Facts & Figures  
4  
5 2015 2015.  
6  
7 <http://www.cancer.org/research/cancerfactsstatistics/cancerfactsfigures2015/>.  
8  
9  
10 56. Mund M, Kloft B, Bundschuh M, *et al*. Global research on smoking and  
11 pregnancy-a scientometric and gender analysis. *Int J Environ Res Public*  
12 *Health* 2014;**11**:5792-806 doi: 10.3390/ijerph110605792published Online First:  
13  
14 2014/06/01].  
15  
16  
17 57. Groneberg-Kloft B, Scutaru C, Kreiter C, *et al*. Institutional operating figures in  
18 basic and applied sciences: scientometric analysis of quantitative output  
19 benchmarking. *Health Res Policy Syst* 2008;**6**:6 doi: 10.1186/1478-4505-6-  
20  
21 6published Online First: 2008/06/17].  
22  
23  
24 58. Goldner TE, Lawson HW, Xia Z, *et al*. Surveillance for ectopic pregnancy--United  
25 States, 1970-1989. *MMWR CDC Surveill Summ* 1993;**42**:73-85 Online First:  
26  
27 1993/12/17].  
28  
29  
30 59. Nagaya K, Fetters MD, Ishikawa M, *et al*. Causes of maternal mortality in Japan.  
31  
32 *JAMA* 2000;**283**:2661-7 Online First: 2000/05/20].  
33  
34  
35  
36  
37  
38  
39  
40  
41  
42  
43  
44  
45  
46  
47  
48  
49  
50  
51  
52  
53  
54  
55  
56  
57  
58  
59  
60

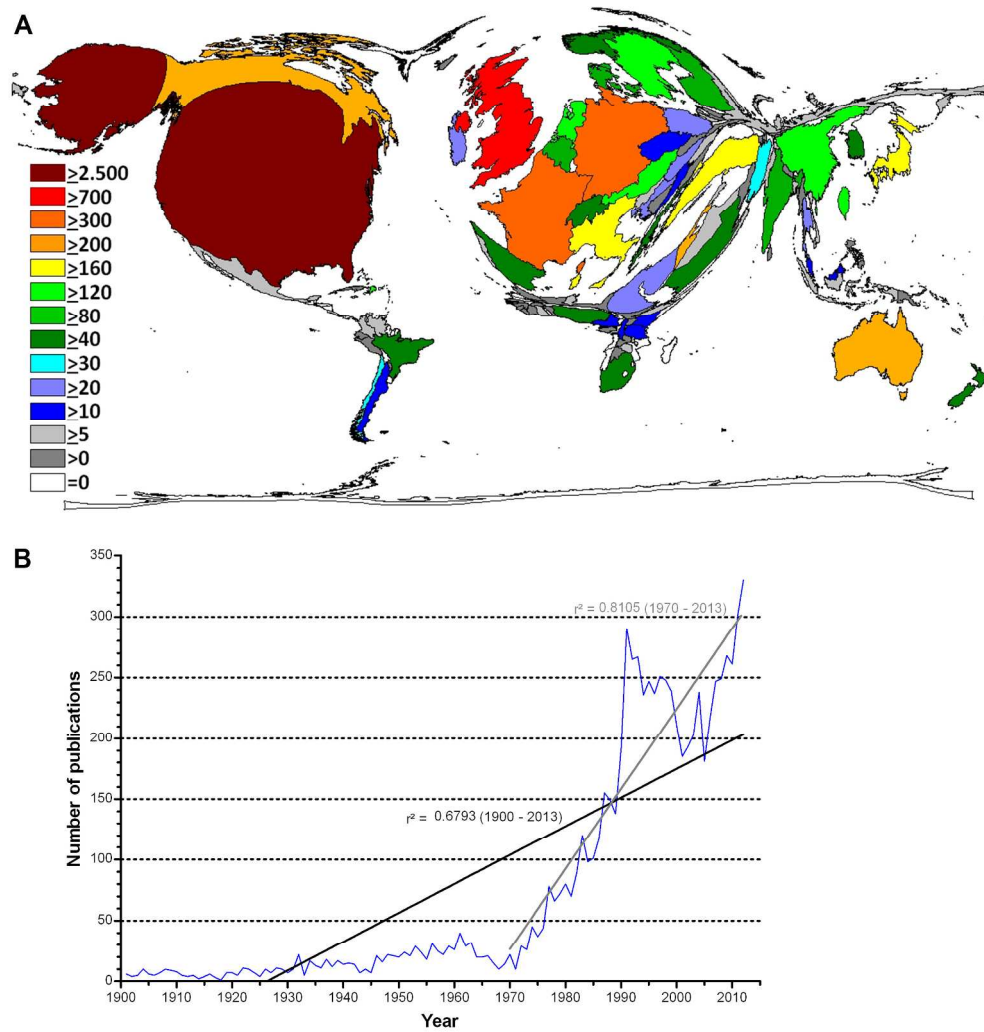

Publication output. A) Global Density-equalizing mapping of ectopic pregnancy publications. The area of each country is scaled in proportion to its total number of ectopic pregnancy-related publications. Colours encode numbers of ectopic pregnancy publications. B) Timely evolution of ectopic pregnancy-related publications.

250x260mm (300 x 300 DPI)

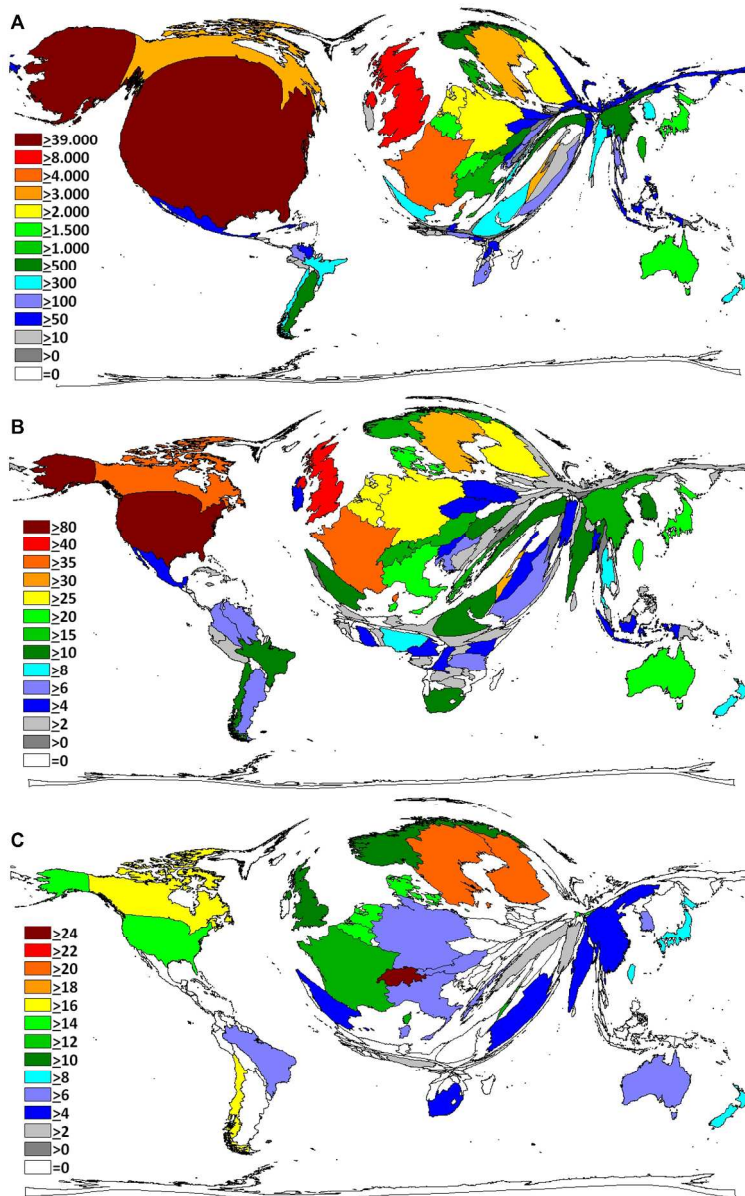

. Density-equalizing maps. A) Density-equalizing map of country total citations of ectopic pregnancy-related publications. The area of each country was scaled in proportion to its total number of ectopic pregnancy-related citations. Colours encode numbers of ectopic pregnancy-related citations. B) Density-equalizing map of country specific H-Index of ectopic pregnancy-related publications. The area of each country was scaled in proportion to the countries' specific H-Index. C) Density-equalizing map of country specific citations per ectopic pregnancy-related publication. Colours encode ectopic pregnancy-related citation rate levels.

250x394mm (300 x 300 DPI)

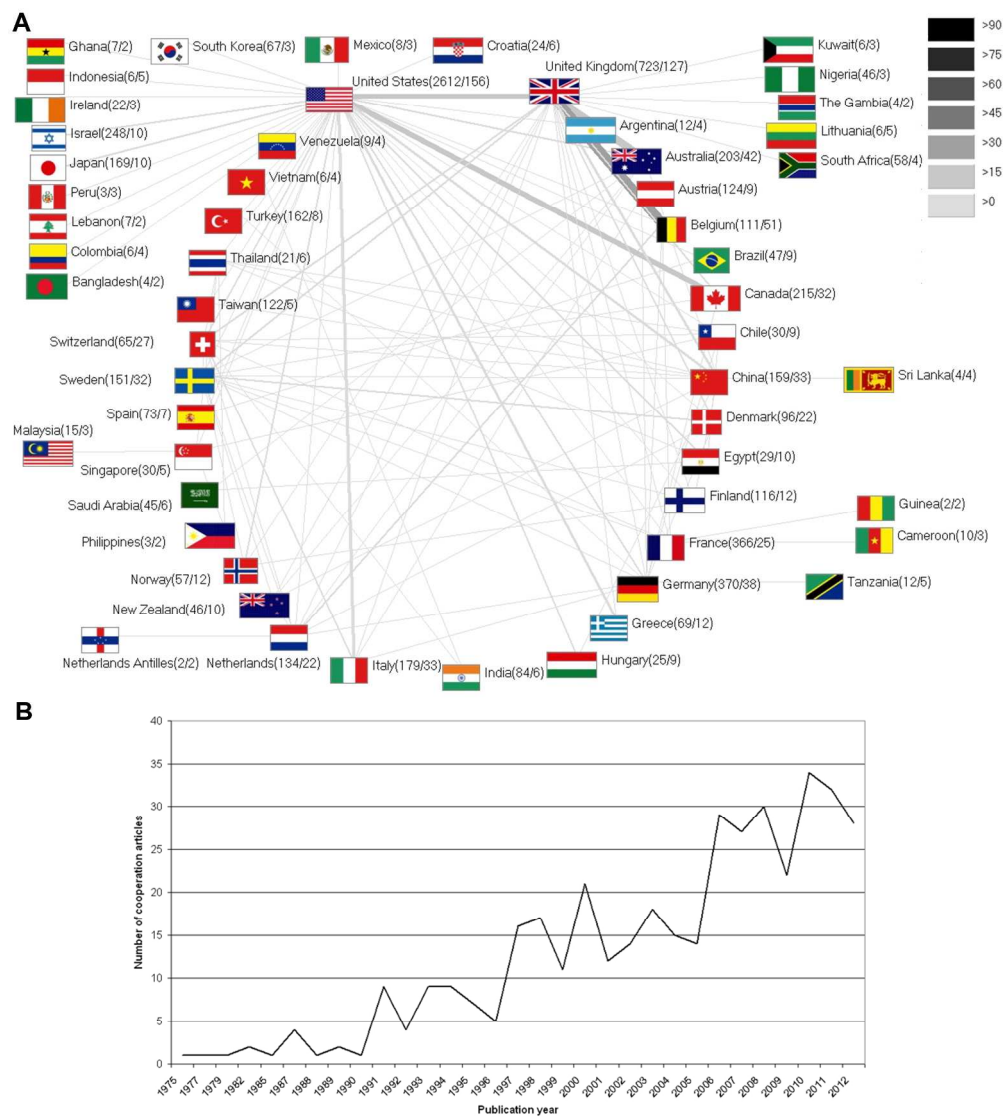

International collaboration. A) Net diagram of international ectopic pregnancy-related collaborations. Line width and grey scale encode numbers of ectopic pregnancy-related collaborations. Numbers in brackets indicate: (number of ectopic pregnancy-related publications of a specific country/number of ectopic pregnancy-related collaboration articles of a specific country). B) Timely evolution of number of ectopic pregnancy-related international collaborations per year.

250x279mm (300 x 300 DPI)

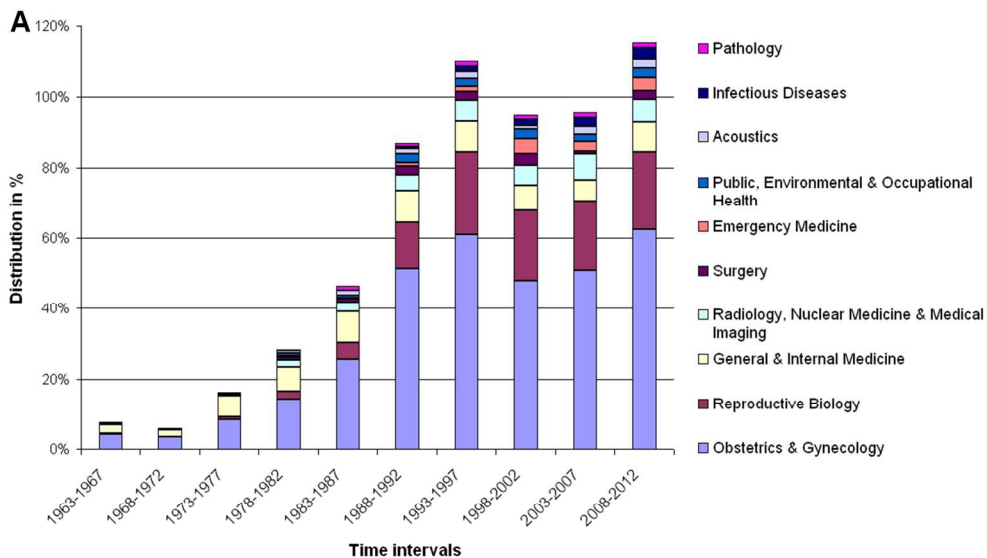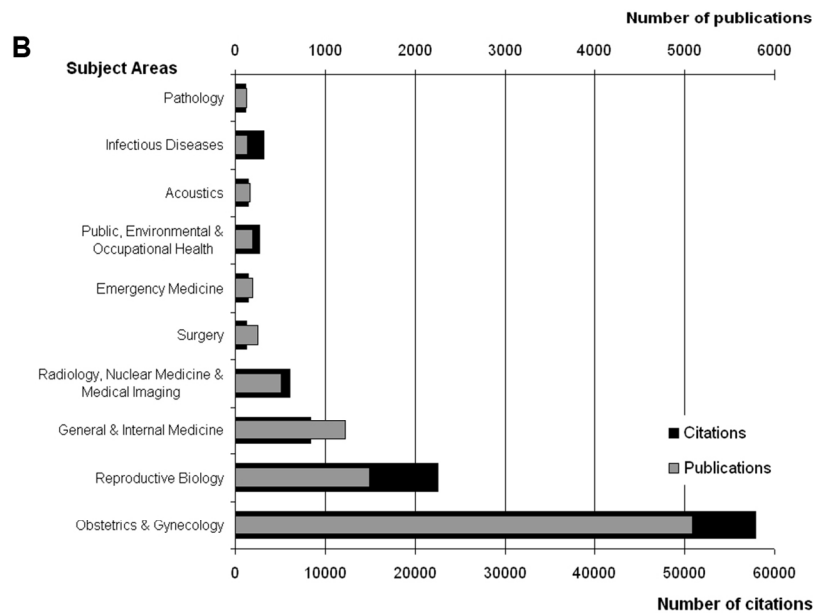

Subject area analysis. A) Timely evolution of subject areas assigned to the ectopic pregnancy-related publications in 5-year periods. Proportion of the 10 most assigned subject areas in 5-year intervals in order to gain insights into the field activity. B) Citation analysis of the 10 most assigned subject areas of all ectopic pregnancy-related publications.

150x181mm (300 x 300 DPI)

1  
2  
3  
4  
5  
6  
7  
8  
9  
10  
11  
12  
13  
14  
15  
16  
17  
18  
19  
20  
21  
22  
23  
24  
25  
26  
27  
28  
29  
30  
31  
32  
33  
34  
35  
36  
37  
38  
39  
40  
41  
42  
43  
44  
45  
46  
47  
48  
49  
50  
51  
52  
53  
54  
55  
56  
57  
58  
59  
60

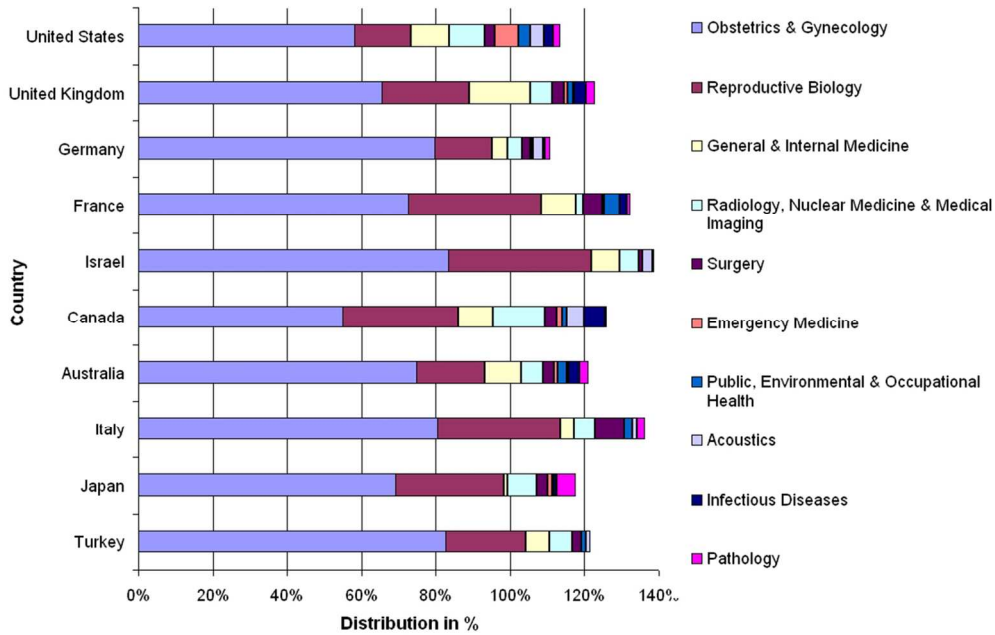

Country-specific analysis of assigned subject categories. Analysis was performed of the 10 most active countries in ectopic pregnancy research in order to identify regional differences in ectopic pregnancy research.

150x95mm (300 x 300 DPI)

View only

# BMJ Open

## Ectopic pregnancy – exploration of its global research architecture using density-equalizing mapping and socioeconomic benchmarks

|                                 |                                                                                                                                                                                                                                                                                                                                                                                                                                                                                                                                                                                                                                                                                                                                                                                                                                                                                                        |
|---------------------------------|--------------------------------------------------------------------------------------------------------------------------------------------------------------------------------------------------------------------------------------------------------------------------------------------------------------------------------------------------------------------------------------------------------------------------------------------------------------------------------------------------------------------------------------------------------------------------------------------------------------------------------------------------------------------------------------------------------------------------------------------------------------------------------------------------------------------------------------------------------------------------------------------------------|
| Journal:                        | <i>BMJ Open</i>                                                                                                                                                                                                                                                                                                                                                                                                                                                                                                                                                                                                                                                                                                                                                                                                                                                                                        |
| Manuscript ID                   | bmjopen-2017-018394.R1                                                                                                                                                                                                                                                                                                                                                                                                                                                                                                                                                                                                                                                                                                                                                                                                                                                                                 |
| Article Type:                   | Research                                                                                                                                                                                                                                                                                                                                                                                                                                                                                                                                                                                                                                                                                                                                                                                                                                                                                               |
| Date Submitted by the Author:   | 15-Aug-2017                                                                                                                                                                                                                                                                                                                                                                                                                                                                                                                                                                                                                                                                                                                                                                                                                                                                                            |
| Complete List of Authors:       | Brüggmann, Dörthe; Goethe-Universität Institute of Occupational, Social and Environmental Medicine<br>Kollascheck, Jana; Goethe-Universität Frankfurt am Main Institut für Arbeits Sozial und Umweltmedizin<br>Quarcoo, David; Goethe University, Institute of Occupational Medicine, Social Medicine and Environmental Medicine<br>Bendels, Michael; Goethe-Universität Frankfurt am Main, Institute of Occupational Medicine, Social Medicine and Environmental Medicine<br>Klingelhoefner, Doris; Goethe University, Institute of Occupational Medicine<br>Louwen, Frank; Goethe University, Department of Obstetrics and Gynecology<br>Jaque, Jenny; Keck School of Medicine of the University of Southern California, Department of Obstetrics and Gynecology<br>Groneberg, David; Occupational, Social and Environmental Medicine, Medical Department of the Goethe-University Frankfurt am Main |
| <b>Primary Subject Heading</b>: | Obstetrics and gynaecology                                                                                                                                                                                                                                                                                                                                                                                                                                                                                                                                                                                                                                                                                                                                                                                                                                                                             |
| Secondary Subject Heading:      | Epidemiology, Global health, Health informatics                                                                                                                                                                                                                                                                                                                                                                                                                                                                                                                                                                                                                                                                                                                                                                                                                                                        |
| Keywords:                       | ectopic pregnancy, density equalizing mapping, female health, reproduction biology                                                                                                                                                                                                                                                                                                                                                                                                                                                                                                                                                                                                                                                                                                                                                                                                                     |
|                                 |                                                                                                                                                                                                                                                                                                                                                                                                                                                                                                                                                                                                                                                                                                                                                                                                                                                                                                        |

SCHOLARONE™  
Manuscripts



1  
2  
3 **Ectopic pregnancy – exploration of its global research architecture using**  
4 **density-equalizing mapping and socioeconomic benchmarks**  
5  
6  
7  
8  
9

10  
11 Short title: Global architecture of ectopic pregnancy research  
12  
13

14  
15  
16 Dörthe Brüggmann<sup>1-3\*</sup>, Jana Kollascheck<sup>2</sup>, David Quarcoo<sup>2</sup>, Michael H. Bendels<sup>2</sup>,  
17  
18 Doris Klingelhöfer<sup>2</sup>, Frank Louwen<sup>3</sup>, Jenny M Jaque<sup>1</sup>, David A Groneberg<sup>2</sup>  
19  
20  
21  
22  
23

24  
25 <sup>1</sup> Department of Obstetrics and Gynecology, Keck School of Medicine of USC, Los  
26  
27 Angeles, California, United States of America  
28

29  
30 <sup>2</sup> Division of Female Health & Preventive Medicine, Institute of Occupational  
31  
32 Medicine, Social Medicine and Environmental Medicine, Goethe-University,  
33  
34 Frankfurt, Germany  
35

36  
37 <sup>3</sup> Department of Gynecology and Obstetrics, Goethe-University, Frankfurt, Germany  
38  
39  
40  
41  
42

43 \*Corresponding author  
44

45  
46 E-mail: [prevention@uni-frankfurt.de](mailto:prevention@uni-frankfurt.de) (DB)  
47  
48  
49  
50  
51  
52  
53  
54  
55  
56  
57  
58  
59  
60

## ABSTRACT

Objective: About 2% of all pregnancies are complicated by the implantation of the zygote outside the uterine cavity and termed ectopic pregnancy. Whereas a multitude of guidelines exists and related research is constantly growing, no thorough assessment of the global research architecture has been performed yet. Hence, we aim to assess the associated scientific activities in relation to geographical and chronological developments, existing research networks and socio-economic parameters.

Design: retrospective, descriptive study

Setting: On the basis of the NewQIS platform, scientometric methods were combined with novel visualizing techniques such as density equalizing mapping to assess the scientific output on ectopic pregnancy. Using the Web of Science, we identified all related entries from 1900 to 2012.

Results: 8,040 publications were analyzed. The United States (US) and the United Kingdom (UK) were dominating the field in regards to overall research activity (2,612 and 723 publications), overall citation numbers and country-specific H-Indices (US: 80, UK: 42). Comparison to economic power of the most productive countries demonstrated that Israel invested more resources in ectopic pregnancy-related research than other nations (853.41 ectopic pregnancy-specific publications per 1000 Bio USD GDP), followed by the UK (269.97). Relation to the GDP per capita index revealed 49.3 ectopic pregnancy-specific publications per 1000 USD GDP per capita for the US in contrast to 17.31 for the UK. Semi-qualitative indices such as country-specific citation rates ranked Switzerland first (24.7 citations per ectopic pregnancy-

specific publication), followed by the Scandinavian countries Finland and Sweden. Low-income countries did not exhibit significant research activities.

Conclusions: This is the first in-depth analysis of global ectopic pregnancy research since 1900. It offers unique insights into the global scientific landscape. Besides the US and the UK, Scandinavian countries and Switzerland can also be regarded as leading nations with regard to their relative socioeconomic input.

## KEY WORDS

ectopic pregnancy; density equalizing mapping; female health; reproduction biology

## STRENGTH AND LIMITATIONS

- We compiled the first concise depiction of the worldwide scientific productivity related to ectopic pregnancies.
- The NewQIS platform was used to evaluate the scientific output regarding quantitative and qualitative aspects, geographical and chronological developments, existing research networks and socio-economic benchmarks. The method combines scientometric methods and “density equalizing mapping projections in a reliable and standardized way.
- The WoS focuses on English journals. It is a weakness that non-English articles are underrepresented in our analysis.
- We analysed citation-based parameters, which rather reflect the recognition of the research in the scientific community than truly measure quality.

## INTRODUCTION

1  
2  
3  
4  
5  
6  
7  
8  
9  
10  
11  
12  
13  
14  
15  
16  
17  
18  
19  
20  
21  
22  
23  
24  
25  
26  
27  
28  
29  
30  
31  
32  
33  
34  
35  
36  
37  
38  
39  
40  
41  
42  
43  
44  
45  
46  
47  
48  
49  
50  
51  
52  
53  
54  
55  
56  
57  
58  
59  
60

Around 2% of zygotes implant outside the uterine lining and form an ectopic gestation<sup>1</sup>. Frequently, the products of conception grow in the fallopian tube. Other implantation sites are the ovaries or the cervix. Affected patients may face significant morbidity or even mortality<sup>1</sup>. During the last decades, transvaginal ultrasound and beta-human chorionic gonadotropin (beta-HCG) levels became part of the clinical routine<sup>2-6</sup> leading to the timely detection of ectopic pregnancies and better patient outcomes<sup>7-9</sup>. First scientific publications describing therapeutic measures for ectopic pregnancies date back to the 16<sup>th</sup> century. Since then, thousands of studies tackled the most pressing questions in the field<sup>1, 10-12</sup>. Numerous discoveries improved diagnosis and management, and shaped the clinical guidelines we are using today<sup>13</sup>. Despite these hallmark advances in clinical care, ectopic pregnancies pose a significant burden on million women around the globe: In the United States of America (US) alone, costs related to the condition were estimated at around \$1 billion in 1990<sup>14</sup>. Although the mortality associated with ectopic gestations was halved in industrialized countries since the 1980s<sup>15</sup>, the condition constitutes a major cause of death continents like Asia and Africa<sup>16</sup>.

A multitude of disciplines such as OB/GYN, Family Medicine, Internal Medicine and Surgery are involved in the management of ectopic pregnancies. Also, related research attracts the interest of scientists worldwide addressing the issue from a clinical, basic science and Public Health perspective. To carry out research according to identified shortcomings, establish global networks and allocate funds, scientists and funding institutions have to be aware of the global scientific landscape related to ectopic pregnancy research. Thus, this study provides a first comprehensive assessment of the research performance in the field and identifies trends in the

1  
2  
3 related literature by a scientometric approach <sup>17, 18</sup>. Therefore, we identified all  
4 ectopic pregnancy-related publications indexed in the Web of Science until 2012.  
5  
6 These items were (1) analysed in reference to their content and citations describing  
7 geographical and historical developments, (2) research networks were identified and  
8  
9 (3) the country-specific productivity was related to socioeconomic variables.  
10  
11 Furthermore, we present the most cited publications related to ectopic pregnancies.  
12  
13 These studies cover key discoveries in the field and provide the scientific fundament  
14  
15 for many clinical decisions made daily around the globe.  
16  
17  
18  
19  
20  
21  
22  
23

## 24 **MATERIALS AND METHODS**

### 25 **NewQIS study protocol**

26  
27  
28 We employed the 'New Quality and Quantity Indices in Science' (NewQIS) platform  
29  
30 to assess global ectopic pregnancy research in a standardized, reliable and objective  
31  
32 way <sup>17, 18</sup>. This tool combines scientometric techniques to assess scientific  
33  
34 productivity and density equalizing mapping <sup>19</sup> to generate global maps according to  
35  
36 analysed parameters <sup>20-23</sup>.  
37  
38  
39  
40  
41  
42  
43  
44  
45

### 46 **Data source**

47  
48 The database Web of Science (WoS, Thomson Scientific) was used to conduct this  
49  
50 study. We selected this data source because it allows the assessment of publication  
51  
52 activity similar to the PubMed database, but facilitates a thorough citation analysis for  
53  
54 the research in focus <sup>24, 25</sup>.  
55  
56  
57  
58  
59  
60

## Search strategy

The following search term was used: “*ectopic pregnanc\**” OR “*ovarian pregnanc\**” OR “*cervical pregnanc\**” OR “*tubal pregnanc\**” OR “*abdominal pregnanc\**” OR “*extrauterine pregnanc\**” OR “*ectopic gestation\**” OR “*ovarian gestation\**” OR “*cervical gestation\**” OR “*tubal gestation\**” OR “*abdominal gestation\**” OR “*extrauterine gestation\**”. We performed a “Topic” search, and the term was inserted into the WoS search fields “title”, “abstract” and “key words” to identify the total number of published items related to ectopic pregnancies.

## Timeframe

The analysed timeframe for research on ectopic pregnancy encompassed the years between 1900 (01-01) and 2012 (31-12). Results from 2013 onwards were not considered due to incomplete data acquisition (i.e. citation rate) at the time the study was performed.

## Data analysis and categorization

Metadata were retrieved in Plain Text Format (S1 File) as described in previously published NewQIS studies<sup>26, 27</sup>. Bibliometric details were analysed with respect to quantitative and semi-qualitative aspects such as originating countries, languages, journals, citations, cited references, year published and subject areas. Subject area categories are assigned to every journal and its publications by the Journal Citation Reports (provided by the Institute of Scientific Information) during the publication

1  
2  
3 process. These standard categories can be retrieved via WoS. For our analyses,  
4  
5 these original WoS categories have been used.  
6  
7

8 As semi-qualitative items describing the recognition of publications by the scientific  
9  
10 community, the number of citations, citation rates and the modified H-Indices (HI)  
11  
12 were investigated, as previously described <sup>28</sup>. Therefore, the citation numbers were  
13  
14 retrieved for each publication and the average citations per item (citation rate) were  
15  
16 calculated. Regression analysis was used to investigate the timely evolution of  
17  
18 ectopic pregnancy research.  
19  
20

21  
22 After the transformation of the raw data to excel program charts and analysis, the  
23  
24 findings were illustrated in numerous diagrams and visualized by the use of density-  
25  
26 equalizing mapping projections (DEMP). The algorithm for this procedure was  
27  
28 published by Gastner and Newman <sup>19</sup>. In DEMPs, the territories of the different  
29  
30 countries were resized in proportion to our selected variables such the distribution of  
31  
32 country-specific numbers of published items, average citation rates and H-Indices.  
33  
34  
35  
36  
37  
38  
39

### 40 **Socioeconomic analysis**

41  
42 In order to assess research output with regard to the economic power of the most  
43  
44 active countries, the publication activity was related to the Gross Domestic Product  
45  
46 (GDP) and the GDP per capita in current USD, as described earlier <sup>29</sup>. According to  
47  
48 the World Bank, the GDP at purchaser's prices is the sum of gross value added by all  
49  
50 resident producers in the economy plus any product taxes and minus any subsidies  
51  
52 not included in the value of the products. It is calculated without making deductions  
53  
54 for depreciation of fabricated assets or for depletion and degradation of natural  
55  
56 resources. Data are in current U.S. dollars. Dollar figures for GDP are converted from  
57  
58  
59  
60

1  
2  
3 domestic currencies using single year official exchange rates. For a few countries  
4  
5 where the official exchange rate does not reflect the rate effectively applied to actual  
6  
7 foreign exchange transactions, an alternative conversion factor is used  
8  
9  
10 (<http://data.worldbank.org/indicator/NY.GDP.MKTP.CD>).

11  
12 The GDP per capita is defined as gross domestic product divided by midyear  
13  
14 population. GDP is the sum of gross value added by all resident producers in the  
15  
16 economy plus any product taxes and minus any subsidies not included in the value of  
17  
18 the products. It is calculated without making deductions for depreciation of fabricated  
19  
20 assets or for depletion and degradation of natural resources. Data are in current U.S.  
21  
22 dollars (<http://data.worldbank.org/indicator/NY.GDP.PCAP.CD>).

### 30 **Analysis of international ectopic pregnancy research collaborations**

31  
32 To investigate international research collaborations, the affiliations of all identified  
33  
34 ectopic pregnancy-related publications were screened as described earlier<sup>30, 31</sup>. In  
35  
36 brief, if at least two authors, who were working in different countries, contributed to  
37  
38 one ectopic pregnancy-related publication, this relationship was defined as a  
39  
40 collaborative publication. To visualize the productivity of collaborations for each pair  
41  
42 of countries, a vector was calculated. Its line width and shade of grey is proportional  
43  
44 to the number of depicted collaborations<sup>24, 32</sup>.

## 52 **RESULTS**

### 55 **Global ectopic pregnancy research activity**



1  
2  
3 We identified 8,040 ectopic pregnancy-related publications issued from 1900 to 2012;  
4 these were cited 86,680 times. 92.4% of these items were written in English and  
5 published by researchers from 76 different countries. US-American researchers  
6 authored 2612 publications accounting for 32% of all ectopic pregnancy-related  
7 publications. The US was identified as the country with the highest number of  
8 publications worldwide (Fig 1A). The United Kingdom (UK) was positioned second  
9 with 723 ectopic pregnancy publications, followed by Germany (370 publications),  
10 France (366 publications), Israel (248 publications), Canada (215 publications),  
11 Australia (203 publications), Italy (179 publications), Japan (169 publications), Turkey  
12 (162 publications), China (159 publications), Sweden (151 publications), the  
13 Netherlands (134 publications), Austria (124 publications) and Taiwan (122  
14 publications). Since North America, Western Europe and Australia were responsible  
15 for the majority of research output associated with “ectopic pregnancy”, their country  
16 sizes appear inflated in the DEMP-analysis (Fig 1A). Major parts of Asia (except  
17 China and Taiwan), Russia, Africa and South America occupied only small areas on  
18 the cartogram. The analysis of the timely evolution led to a regression coefficient of  
19 0.6793 for the period from 1900 until 2012 and of 0.8105 for the period from 1970  
20 until 2012 (Fig 1B). This indicated a strong increase of global research activity in the  
21 past 40 years.  
22  
23  
24  
25  
26  
27  
28  
29  
30  
31  
32  
33  
34  
35  
36  
37  
38  
39  
40  
41  
42  
43  
44  
45  
46  
47  
48

### 49 **Socioeconomic analysis of ectopic pregnancy research**

50  
51  
52 In order to assess the relative magnitude of the countries research activities in  
53 relation to their economic wealth, the two indicators GDP and GDP per capita were  
54 used for our evaluation. The analysis of publication activity in relation to the most  
55 productive countries' GDP demonstrated that Israel published the highest amount of  
56  
57  
58  
59  
60

ectopic pregnancy-specific research relative to its GDP: 853.41 publications per 1000 bn USD GDP. It was followed by the UK with 269.97 ectopic pregnancy-specific publications per 1000 bn USD GDP, Turkey (196.79 publications per 1000 bn USD GDP) and the US (155.77 publications per 1000 bn USD GDP) (Table 1).

When the ectopic pregnancy publication activity was related to the GDP per capita, the US again gained the leading position with a level of 49.3 ectopic pregnancy specific publications per 1000 USD GDP per capita. This benchmarking largely resembled the total publication activity analysis with the exception of Turkey, which climbed from tenth to third position due to its extremely low GDP per capita (Table 1).

**Table 1. Socio-economic analysis of ectopic pregnancy research of the ten most active countries.** Sources for GDP and GDP per capita in 2013:

<http://data.worldbank.org/indicator/NY.GDP.PCAP.CD>

| Country        | Number of publications | GDP in 1000 bn US-\$ | Publications / GDP in 1000 bn US-\$ | GDP per capita in 1000 US-\$ | Publ. / GDP per Capita in 1000 US-\$ |
|----------------|------------------------|----------------------|-------------------------------------|------------------------------|--------------------------------------|
| Israel         | 248 (5)                | 0.2906 (10)          | 853.41 (1)                          | 36.05 (8)                    | 6.88 (6)                             |
| United Kingdom | 723 (2)                | 2.6781 (5)           | 269.97 (2)                          | 41.78 (6)                    | 17.31 (2)                            |
| Turkey         | 162 (10)               | 0.8232 (9)           | 196.79 (3)                          | 10.99 (10)                   | 14.75 (3)                            |
| United States  | 2612 (1)               | 16.7681 (1)          | 155.77 (4)                          | 52.98 (2)                    | 49.30 (1)                            |
| France         | 366 (4)                | 2.8102 (4)           | 130.24 (5)                          | 42.63 (5)                    | 8.59 (4)                             |
| Australia      | 203 (7)                | 1.5604 (8)           | 130.09 (6)                          | 67.47 (1)                    | 3.01 (10)                            |
| Canada         | 215 (6)                | 1.8389 (7)           | 116.92 (7)                          | 52.31 (3)                    | 4.11 (9)                             |
| Germany        | 370 (3)                | 3.7303 (3)           | 99.19 (8)                           | 46.26 (4)                    | 8.00 (5)                             |

|       |         |            |            |           |          |
|-------|---------|------------|------------|-----------|----------|
| Italy | 179 (8) | 2.1369 (6) | 83.77 (9)  | 35.48 (9) | 5.05 (7) |
| Japan | 169 (9) | 4.9195 (2) | 34.35 (10) | 38.63 (7) | 4.37 (8) |

### Global citation analysis

Citation analysis of all country-specific publications demonstrated a leading position of the US. US-American publications dedicated to ectopic pregnancy research received a total of 39,404 citations (Fig. 2A). It was followed by the UK with over 8,000 citations, France (4,423 citations), Canada (3,578 citations), Israel (3,057 citations) and Sweden (3,349 citations). DEMP analysis regarding the citation activity was similar to the cartogram reflecting absolute publication numbers: The map represents nearly no citations for African, South American or Asian countries leading to a minimized appearance of these areas whereas North America and Europe are depicted increased in size (Fig 2A).

The calculation of the country-specific H-Index (Fig 2B) showed a leading position of the US with 80 ectopic pregnancy-related publications being cited at least 80 times. The US was followed by the UK with a country-specific H-Index of 42, Canada (H-Index: 36), France (H-Index: 35), Israel (H-Index: 31), Sweden (H-Index: 30), Finland (H-Index: 29), the Netherlands (H-Index: 29), Belgium (H-Index: 25) and Germany (H-Index: 25). Again, countries from Africa, Eastern Europe, Latin America or Russia exhibited very low rates.

The results of the country-specific citation rate (Fig 2C) contrasted all other benchmarks since Switzerland ranked first with a citation rate (CR) of 24.7, followed by the Scandinavian countries Finland and Sweden with CR of 20.9 and 20.2, respectively.

## Cooperation articles

Out of the 8,040 ectopic pregnancy-related publications, only 397 were published within international collaborations. This equates a relatively small percentage of 4.9%. With 82.1% (326 publications), bilateral collaborations were the most common type of established collaborative efforts, followed by trilateral (51) co-operations. The US was the leading country with 156 collaborations followed by the UK with 127 international relationships. The most frequent bilateral collaboration was set up between the UK and Belgium with 37 joint studies. Interestingly, 51 out of the 111 total studies from Belgium arose from international collaborations, which equals a percentage of 45.9% (Fig 3A). In comparison, the US was characterized by a ratio of 156 collaborative publications out of 2,612 (6%), the UK by 17.6% and Germany by 10.3%. A continuous increase in the numbers of collaborations was present until 2010 with 34 collaborative publications in this year (Fig 3B).

## Subject area analysis

The timely evolution in subject categories of ectopic pregnancy-related publications was analysed since 1973 and the proportion of the different subject areas was investigated (Fig 4A). Articles can be assigned to more than one category, hence percentages of more than 100 were possible. From the beginning until 2012, "Obstetrics & Gynecology" remained the most prominent category. "Reproductive Biology" gained importance after 1988. The field diversified in 1978 when research was also published in the categories of "Emergency Medicine" (since 1978) and "Pathology" (since 1983). Overall, the percentages of all assigned subject categories

1  
2  
3 remained relatively constant with no rapid increase of one particular area within the  
4  
5 past 20 years. A small but constant proportion of publications was attributed to the  
6  
7 area of “Public, Environmental & Occupational Health”, which indicates that scientists  
8  
9 also focused upon Public Health issues related to ectopic pregnancy.  
10

11  
12 We identified the leading, most impactful publication categories based on item and  
13  
14 citation count (Fig 4B). The primary areas of ectopic pregnancy-research were  
15  
16 “Obstetrics & Gynecology” and “Reproductive Biology”. The 5,100 publications  
17  
18 assigned to “Obstetrics & Gynecology” were cited 57,879 times. “Reproductive  
19  
20 Biology” with 1,496 publications was cited 22,545 times. When citation rates were  
21  
22 analysed, the highest rate was present for the subject area “Infectious Diseases” with  
23  
24 24.02 citations per ectopic pregnancy-related publication. The frequently assigned  
25  
26 subject areas “Reproductive Biology” and “Obstetrics & Gynecology” were  
27  
28 characterized by citation rates of 15.07 and 11.37 respectively.  
29  
30  
31  
32  
33  
34  
35  
36  
37  
38  
39  
40  
41  
42  
43  
44  
45  
46  
47  
48  
49  
50  
51  
52  
53  
54  
55  
56  
57  
58  
59  
60

We performed a subject area analysis for the most productive countries aiming to pinpoint the particular focus researchers are working on in these nations: In France, a high volume of “Public Health”-related work was published. This finding underlines the nation’s interest to allocate considerable resources to Public Health issues in context with ectopic pregnancies. A relatively high percentage of Public Health-related ectopic pregnancy research originated from the US when compared to other countries, e.g. Japan. Also, US-American scientists focused more on emergency medicine aspects of ectopic pregnancy research than researchers from all other countries. This is reflected by a high percentage of allocated publications originating from the US to that category (Fig 5). Also, we identified the key publications in the field of ectopic pregnancy research, which were cited 200 times or more (Table 2).

**Table 2. Key publications in the field of ectopic pregnancy research.** These articles were published since 1900 and cited 200 times or more.

| Title                                                                                                         | Publication Year | Country                                      | Citations | Journal             |
|---------------------------------------------------------------------------------------------------------------|------------------|----------------------------------------------|-----------|---------------------|
| WHO analysis of causes of maternal death: a systematic review<br><i>Khan KS et al.</i> <sup>33</sup>          | 2006             | Switzerland,<br>United Kingdom,<br>Argentina | 534       | LANCET              |
| Comparative genomes of Chlamydia pneumoniae and C-trachomatis<br><i>Kalman S et al.</i> <sup>34</sup>         | 1999             | United States                                | 457       | NAT GENET           |
| Pelvic inflammatory disease and fertility<br><i>Westström L et al.</i> <sup>35</sup>                          | 1992             | United States                                | 347       | SEX TRANSM DIS      |
| Genital chlamydial infections - epidemiology and reproductive sequelae<br><i>Cates W et al.</i> <sup>36</sup> | 1991             | United States                                | 345       | AM J OBSTET GYNECOL |
| Current methods of laboratory diagnosis of Chlamydia                                                          | 1997             | United States                                | 293       | CLIN MICROBIOL      |

|    |                                              |      |                         |     |               |
|----|----------------------------------------------|------|-------------------------|-----|---------------|
| 1  | trachomatis infections                       |      |                         |     | REV           |
| 2  | <i>Black CM et al.</i> <sup>37</sup>         |      |                         |     |               |
| 3  | Prevalence of chlamydial and                 |      |                         |     |               |
| 4  | gonococcal infections among                  |      |                         |     |               |
| 5  | young adults in the                          |      |                         |     |               |
| 6  | United States                                |      |                         |     | JAMA-J AM     |
| 7  | <i>Miller WC et al.</i> <sup>38</sup>        | 2004 | United States           | 270 | MED ASSN      |
| 8  | The epidemiology of smoking                  |      |                         |     |               |
| 9  | during pregnancy                             |      |                         |     |               |
| 10 | <i>Cnattingius S</i> <sup>39</sup>           | 2004 | Sweden                  | 250 | NICOTINE TOB  |
| 11 | Single-dose methotrexate - an                |      |                         |     |               |
| 12 | expanded clinical-trial                      |      |                         |     |               |
| 13 | <i>Stovall TG and Ling FW</i> <sup>40</sup>  | 1993 | United States           | 238 | AM J OBSTET   |
| 14 | A method of screening for                    |      |                         |     |               |
| 15 | ectopic pregnancy and its                    |      |                         |     |               |
| 16 | indications                                  |      |                         |     |               |
| 17 | <i>Kadar N et al.</i> <sup>41</sup>          | 1981 | United States           | 235 | OBSTET        |
| 18 | Maternal age and fetal loss:                 |      |                         |     |               |
| 19 | population based register                    |      |                         |     |               |
| 20 | Linkage study                                |      |                         |     |               |
| 21 | <i>Nybo Andersen AM et al.</i> <sup>42</sup> | 2000 | Denmark                 | 234 | BRIT MED J    |
| 22 | Treatment of interstitial ectopic            |      |                         |     |               |
| 23 | pregnancy with methotrexate -                |      |                         |     |               |
| 24 | report of a successful case                  |      |                         |     |               |
| 25 | <i>Tanaka T et al.</i> <sup>43</sup>         | 1982 | Japan                   | 233 | FERTIL STERIL |
| 26 | Discriminatory HCG zone - its                |      |                         |     |               |
| 27 | use in the sonographic                       |      |                         |     |               |
| 28 | evaluation for ectopic pregnancy             |      |                         |     |               |
| 29 | <i>Kadar N et al.</i> <sup>44</sup>          | 1981 | United States<br>France | 229 | OBSTET        |
| 30 | Conservative laparoscopic                    |      |                         |     |               |
| 31 | treatment of 321 ectopic                     |      |                         |     |               |
| 32 | pregnancies                                  |      |                         |     |               |
| 33 | <i>Pouly JL et al.</i> <sup>45</sup>         | 1986 | France                  | 228 | FERTIL STERIL |
| 34 | Incidence, trends, and risks of              |      |                         |     |               |
| 35 | ectopic pregnancy in a                       |      |                         |     |               |
| 36 | population of woman                          |      |                         |     |               |
| 37 | <i>Westström L et al.</i> <sup>46</sup>      | 1981 | Sweden                  | 214 | BRIT MED J    |
| 38 | Early termination of pregnancy               |      |                         |     |               |
| 39 | with mifepristone (RU-486) and               |      |                         |     |               |
| 40 | the orally active prostaglandin              |      |                         |     |               |
| 41 | misoprostol                                  |      |                         |     |               |
| 42 | <i>Peyron R et al.</i> <sup>47</sup>         | 1993 | France                  | 216 | N ENGL J MED  |
| 43 |                                              |      |                         |     |               |
| 44 |                                              |      |                         |     |               |
| 45 |                                              |      |                         |     |               |
| 46 |                                              |      |                         |     |               |
| 47 |                                              |      |                         |     |               |
| 48 |                                              |      |                         |     |               |
| 49 |                                              |      |                         |     |               |
| 50 |                                              |      |                         |     |               |
| 51 |                                              |      |                         |     |               |
| 52 |                                              |      |                         |     |               |
| 53 |                                              |      |                         |     |               |
| 54 |                                              |      |                         |     |               |
| 55 |                                              |      |                         |     |               |
| 56 |                                              |      |                         |     |               |
| 57 |                                              |      |                         |     |               |
| 58 |                                              |      |                         |     |               |
| 59 |                                              |      |                         |     |               |
| 60 |                                              |      |                         |     |               |

## Journal analysis

We carried out an analysis of the most publishing journals in the field of ectopic pregnancy research (Fig. 6). Here, "Fertility and Sterility" published the most articles on ectopic pregnancy (689 publications), followed by the "American Journal of Obstetrics and Gynecology" (653 publications), "Obstetrics and Gynecology" (466 publications), and "Human Reproduction" (396 publications). These four journals belong to the top ranked journals in Gynecology and Obstetrics with impact factors more than 4.5. Regarding the average citation rate among the 15 most publishing journals, "Obstetrics and Gynecology" received the highest rate with 20.5 citations per article (CR = 20.5). We found the "British Journal of Obstetrics and Gynecology" (CR = 17.3) in second position. It was ranked 14<sup>th</sup> regarding the total number of publications (95 publications). It existed until 2012 and was continued as "International Journal of Gynecology and Obstetrics" that ranked 8<sup>th</sup> regarding total publication numbers (166 publications) and reached an average citation rate of 5.93. Actually, the publication performance of both journals should be summed up, resulting in 261 publications and a CR = 10.05.

Regarding the CR, "Human Reproduction" was positioned third (CR = 16.9) and was ranked before the "Lancet" (CR = 14.4 and 129 publications). Among the 15 most publishing was only one non-English journal – the German journal "Geburtshilfe und Frauenheilkunde" (ranked 9<sup>th</sup> with 156 publications on ectopic pregnancy and a CR = 3.1). It is the official publication platform of the German Society of Gynecology and Obstetrics. Among the 15 most publishing journals, 7 are published in the UK, 4 in the US, 2 in Germany and 1 in Australia and Scandinavia, respectively.



## DISCUSSION

Accounting for a percentage of 2% of all first-trimester pregnancies in the US, ectopic gestation is a very common complication of pregnancy. It should therefore merit a high degree of interest within the scientific community. Hence, this NewQIS study<sup>17, 18</sup> is focused on this condition and presents the first multifaceted analysis of the related global research architecture using density equalizing mapping analysis tools<sup>19</sup>. Additionally, we selected 15 “publication classics” that were defined as key articles in the field based on 200 and more citations. These key publications provide relevant background information for individual scholarship, practice and research endeavours.

In total, we analysed 8,040 publications related to ectopic pregnancies. The US was identified as the country dominating the field. With regard to total publishing activities, it is important to compare ectopic pregnancy research to other disease entities or to the field of OB/GYN in general: A recent study by Aleixandre-Benavent et al. focused on trends in reproductive medicine research over a period of 10 years<sup>48</sup>. It was the authors’ objective to study the publication activity metrics from 2003 to 2012 and to shed a light on the clinical, social, and epidemiologic implications of this relatively new but rapidly emerging field. As outcome measures, they analysed most productive and frequently cited investigators, institutions, and countries as well as specific areas of research and scientific collaborations. The authors found that 90 investigators with more than 1,000 citations had jointly published 4,010 articles. The most-cited study groups were located in the Netherlands, Belgium, Spain, the US, and the UK, and collaborative studies have been increasing. It was concluded that reproductive medicine research has attained scientific interest and importance. Also,

1  
2  
3 the increase in (inter)national collaborations seems to be the key to the field's  
4  
5 success. In contrast to Aleixandre-Benavent et al., we focused on a single disease  
6  
7 entity and encompassed more than one hundred years of research. Besides  
8  
9 monitoring the scientific output, we also related the numbers to the economic power  
10  
11 of investigated countries in order to dissect the real interest of single nations in  
12  
13 research related to a particular condition. Therefore, we related the ectopic  
14  
15 pregnancy-related research activities to the total GDP and the GDP per capita. We  
16  
17 found that the US still dominated when GDP per capita index was used. However,  
18  
19 when related to the total GDP index, Israel exhibited the highest contribution of  
20  
21 ectopic pregnancy research in relation to its overall economic power.  
22  
23

24  
25  
26 We compared the present data to other OBGYN entities such as polycystic ovary  
27  
28 syndrome (PCOS) or ovarian cancer<sup>49, 50</sup>: A published study on PCOS that covered  
29  
30 the years between 1900 and 2014 reported a total of 6261 PCOS-specific  
31  
32 publications and 703 international research collaborations in the Web of Science. As  
33  
34 in the present study, the USA was identified as the most active country in total and  
35  
36 collaborative research activity<sup>49</sup>. In the socioeconomic analysis, the USA was also  
37  
38 ranked first concerning PCOS-related publications per gross domestic product,  
39  
40 followed by the UK, Italy and Greece<sup>49</sup>. For ovarian cancer research 23,378 reports  
41  
42 were identified for the period 1900 - 2014. Denmark was positioned at the first place  
43  
44 with a total of 1293.2 calculated ovarian cancer-specific articles per 1000 billion US-\$  
45  
46 GDP<sup>50</sup>. Other gynecological topics, which have been screened for scientific  
47  
48 productivity, were predominantly related to breast cancer<sup>51-54</sup>: Glynn et al. presented  
49  
50 an in-depth evaluation of breast cancer research. The authors screened publications  
51  
52 from 1945 to 2008 also using the NewQIS platform<sup>54</sup>. They identified 180,126 breast  
53  
54 cancer-associated items; these had been cited 4,136,224 times. In comparison to our  
55  
56  
57  
58  
59  
60

1  
2  
3 data on ectopic pregnancies encompassing a time span of 112 years, breast cancer  
4  
5 research has produced a more than 20 times greater scientific output in a period of  
6  
7 slightly over 60 years. One reason for this discrepancy is that breast cancer accounts  
8  
9 for the most common malignancy among women, with an estimated 231,840 new  
10  
11 cases diagnosed in the US in 2015 alone <sup>55</sup>. Hence, this disease receives large  
12  
13 amounts of public awareness. Also, significant volumes of scientific resources are  
14  
15 allocated to support research in this area. In breast cancer, the US produced the  
16  
17 greatest publication output (n = 77,101; 42.8%), followed by the UK (n = 18,357;  
18  
19 10.2%) and Germany (n = 12,529, 7%) <sup>54</sup>. This ranking of the most productive  
20  
21 nations was similar to ectopic pregnancy research with 32.5% ectopic pregnancy-  
22  
23 related publications originating from the US, around 9% from the UK and 4.6% from  
24  
25 Germany. The percentage of total global research activity exhibited by US-American  
26  
27 institutions is higher in breast cancer research than in ectopic pregnancy research.  
28  
29  
30

31  
32 “Smoking in pregnancy” is another area of OB/GYN research that was studied <sup>56</sup>.  
33  
34 Here, 10,043 related publications were identified in a period from 1900 to 2012. As in  
35  
36 our investigation and the presented breast cancer study, the highest number of  
37  
38 scientific works was published by the US (35.5%), followed by the UK (9.9%). For  
39  
40 both countries, we documented similar percentage values and the highest modified  
41  
42 H-Indices of 128 (US) and 42 (UK) for ectopic pregnancy research activities. When  
43  
44 citation performance is compared, it is evident that research in “smoking and  
45  
46 pregnancy” receives a higher attention in the scientific community than scientific  
47  
48 endeavours related to “ectopic pregnancy” since the 10,043 publications in the field  
49  
50 of “smoking and pregnancy” were cited 112,136 times (11.2 citations per publication)  
51  
52 versus 8,040 ectopic pregnancy-related publications that received 86,680 citations  
53  
54 (10.8 citations per publication).  
55  
56  
57  
58  
59  
60

1  
2  
3 In our study, the US occupied the top position among all countries in regards to  
4 overall publication and citation numbers as well as the H-index. We explain this  
5 finding with the outstanding research environment and funding provided for scientists  
6 in the US. Further, we hypothesize that the prominent position of the US might also  
7 be linked to a possible bias: Four of the most prolific journals in the field are based in  
8 the US; they provide an impactful publishing platform for ectopic pregnancy research  
9 (as shown in our journal analysis). US-American reviewers are known for their  
10 favourable evaluation of publications submitted by local researchers leading to a  
11 predominance of US-American works among the accepted manuscripts<sup>57, 58</sup>. But we  
12 regard this “reviewer bias” overall as limited since it can be stated that the observed  
13 dominance of the US is also common in other, non-OB/GYN medical specialties. In a  
14 study that analysed 5,527,558 published items authored in all areas of medicine over  
15 the last 50 years, the following ranking of total research activity was found<sup>59</sup>: The US  
16 was the leading nation, followed by Japan, Germany, the UK, France, and Italy<sup>59</sup>.  
17 Furthermore, it can be clearly stated that Japan does not exhibit comparable  
18 activities in the field of ectopic pregnancy research with only 169 publications in the  
19 present set of data. This finding could be linked to a lower prevalence of ectopic  
20 pregnancies in Japan compared with other nations translating into disregard of the  
21 topic among local scientists and funding institutions. However, epidemiological data  
22 on the exact rates of ectopic pregnancies or pelvic inflammatory disease in Japan are  
23 lacking. Also, data on maternal mortality attributed to ectopic pregnancies are sparse.  
24 For the early nineties, ectopic pregnancy-related maternal mortality was reported at  
25 4% in Japan compared to 13% in the US (data collected until 1989)<sup>60, 61</sup>. Since this  
26 difference could indeed reflect a lower impact of ectopic pregnancies on the public  
27 health of Japanese women, this fact may explain a lacking interest of Japanese  
28 institutions to foster research on this topic.

1  
2  
3 We identified a small number of international collaborations in the field of ectopic  
4 pregnancy research. The rate of 4.9% is substantially lower than in other fields.  
5  
6 Additionally, we documented a very small number of ectopic pregnancy-related  
7 publications investigating Public Health aspects. These findings indicate a low  
8 awareness of this subject matter in terms of ectopic pregnancy research, which is  
9 contrasting the major disease burden this condition poses on women - especially in  
10 low-income countries with high rates of pelvic inflammatory diseases and only limited  
11 access to diagnostic and treatment procedures. Therefore, future research should  
12 pay attention to these problematic issues and focus on fostering collaborative efforts,  
13 involving developing countries in research networks and conducting projects in the  
14 field of Public Health.  
15  
16  
17  
18  
19  
20  
21  
22  
23  
24  
25  
26  
27  
28  
29  
30

## 31 **CONCLUSIONS**

32  
33  
34 The present study is the first combined economic and scientometric study that  
35 depicts a sketch of the global research activities on ectopic pregnancies. With regard  
36 to other disease entities, it can be stated that a mere total of about 8000 related  
37 publications highlights the need to foster research programs on this problematic  
38 condition that endangers female health and human reproduction biology all around  
39 the globe. The lack of research productivity in low-income countries and their missing  
40 presence in international collaborations also exemplifies the need for Public Health  
41 approaches to help women in these parts of the world.  
42  
43  
44  
45  
46  
47  
48  
49  
50  
51  
52  
53  
54  
55  
56  
57  
58  
59  
60

## ACKNOWLEDGEMENTS

We thank G Volante for expert editorial help. This study is part of a thesis project (JK).

## AUTHORS' CONTRIBUTIONS

DB, JK, DQ, MHB, DK, FL, JJ, and DAG have made substantial contributions to the conception and design of the study, acquisition of the data and interpretation. They have been involved in drafting and revising the manuscript. All authors have read and approved the final manuscript.

## CONFLICT OF INTEREST

The authors declare that they have no conflict of interest.

## FUNDING

We did not receive any funding to conduct this study.

## SUPPORTING INFORMATAION

**S1 File. Raw data used in analysis.** For our study, metadata were retrieved in Plain Text Format to establish an interim database, which was used to sort and analyse bibliometric data in regards to variables of interest.

## FIGURE LEGENDS

**Fig 1. Publication output.** A) Global Density-equalizing mapping of ectopic pregnancy publications. The area of each country is scaled in proportion to its total number of ectopic pregnancy-related publications. Colours encode numbers of ectopic pregnancy publications. B) Timely evolution of ectopic pregnancy-related publications.

**Fig 2. Density-equalizing maps.** A) Density-equalizing map of country total citations of ectopic pregnancy-related publications. The area of each country was scaled in proportion to its total number of ectopic pregnancy-related citations. Colours encode numbers of ectopic pregnancy-related citations. B) Density-equalizing map of country specific H-Index of ectopic pregnancy-related publications. The area of each country was scaled in proportion to the countries' specific H-Index. C) Density-equalizing map of country specific citations per ectopic pregnancy-related publication. Colours encode ectopic pregnancy-related citation rate levels.

**Fig 3. International collaboration.** A) Net diagram of international ectopic pregnancy-related collaborations. Line width and grey scale encode numbers of ectopic pregnancy-related collaborations. Numbers in brackets indicate: (number of ectopic pregnancy-related publications of a specific country/number of ectopic pregnancy-related collaboration articles of a specific country). B) Timely evolution of number of ectopic pregnancy-related international collaborations per year.

**Fig 4. Subject area analysis.** A) Timely evolution of subject areas assigned to the ectopic pregnancy-related publications in 5-year periods. Proportion of the 10 most assigned subject areas in 5-year intervals in order to gain insights into the field activity. B) Citation analysis of the 10 most assigned subject areas of all ectopic pregnancy-related publications.

1  
2  
3 **Fig 5. Country-specific analysis of assigned subject categories.** Analysis was  
4  
5 performed of the 10 most active countries in ectopic pregnancy research in order to  
6  
7 identify regional differences in ectopic pregnancy research.  
8  
9

10  
11  
12 **Fig 6.** Number of articles and average citation rate of the most publishing journals on  
13  
14 ectopic pregnancy.  
15  
16  
17  
18  
19  
20  
21  
22  
23  
24  
25  
26  
27  
28  
29  
30  
31  
32  
33  
34  
35  
36  
37  
38  
39  
40  
41  
42  
43  
44  
45  
46  
47  
48  
49  
50  
51  
52  
53  
54  
55  
56  
57  
58  
59  
60



## REFERENCES

1. Marion LL, Meeks GR. Ectopic pregnancy: History, incidence, epidemiology, and risk factors. *Clin Obstet Gynecol* 2012;**55**:376-86 doi: 10.1097/GRF.0b013e3182516d7b published Online First: 2012/04/19].
2. Kirk E, Bottomley C, Bourne T. Diagnosing ectopic pregnancy and current concepts in the management of pregnancy of unknown location. *Hum Reprod Update* 2014;**20**:250-61 doi: 10.1093/humupd/dmt047 published Online First: 2013/10/09].
3. Kao LY, Scheinfeld MH, Chernyak V, *et al.* Beyond ultrasound: CT and MRI of ectopic pregnancy. *AJR Am J Roentgenol* 2014;**202**:904-11 doi: 10.2214/ajr.13.10644 published Online First: 2014/03/26].
4. Orazulike NC, Konje JC. Diagnosis and management of ectopic pregnancy. *Womens Health (Lond Engl)* 2013;**9**:373-85 doi: 10.2217/whe.13.35 published Online First: 2013/07/06].
5. Alkatout I, Honemeyer U, Strauss A, *et al.* Clinical diagnosis and treatment of ectopic pregnancy. *Obstet Gynecol Surv* 2013;**68**:571-81 doi: 10.1097/OGX.0b013e31829cdebepublished Online First: 2013/08/08].
6. van Mello NM, Mol F, Ankum WM, *et al.* Ectopic pregnancy: how the diagnostic and therapeutic management has changed. *Fertil Steril* 2012;**98**:1066-73 doi: 10.1016/j.fertnstert.2012.09.040 published Online First: 2012/10/23].
7. Lermann J, Segl P, Jud SM, *et al.* Low-dose methotrexate treatment in ectopic pregnancy: a retrospective analysis of 164 ectopic pregnancies treated between 2000 and 2008. *Arch Gynecol Obstet* 2014;**289**:329-35 doi: 10.1007/s00404-013-2982-x published Online First: 2013/08/06].

- 1  
2  
3 8. Cecchino GN, Araujo Junior E, Elito Junior J. Methotrexate for ectopic pregnancy:  
4  
5 when and how. *Arch Gynecol Obstet* 2014;**290**:417-23 doi: 10.1007/s00404-  
6  
7 014-3266-9published Online First: 2014/05/06].  
8  
9  
10 9. Hosni MM, Herath RP, Mumtaz R. Diagnostic and therapeutic dilemmas of cervical  
11  
12 ectopic pregnancy. *Obstet Gynecol Surv* 2014;**69**:261-76 doi:  
13  
14 10.1097/ogx.000000000000062published Online First: 2014/08/08].  
15  
16 10. Visconti K, Zite N. hCG in ectopic pregnancy. *Clin Obstet Gynecol* 2012;**55**:410-7  
17  
18 doi: 10.1097/GRF.0b013e31825109dcpublished Online First: 2012/04/19].  
19  
20  
21 11. Rausch ME, Barnhart KT. Serum biomarkers for detecting ectopic pregnancy.  
22  
23 *Clin Obstet Gynecol* 2012;**55**:418-23 doi:  
24  
25 10.1097/GRF.0b013e31825109f6published Online First: 2012/04/19].  
26  
27  
28 12. Casikar I, Reid S, Condous G. Ectopic pregnancy: Ultrasound diagnosis in  
29  
30 modern management. *Clin Obstet Gynecol* 2012;**55**:402-9 doi:  
31  
32 10.1097/GRF.0b013e31825109bdpublished Online First: 2012/04/19].  
33  
34  
35 13. Hajenius PJ, Mol F, Mol BW, *et al.* Interventions for tubal ectopic pregnancy.  
36  
37 *Cochrane Database Syst Rev* 2007CD000324 doi:  
38  
39 10.1002/14651858.CD000324.pub2published Online First: 2007/01/27].  
40  
41  
42 14. Washington AE, Katz P. Cost of and payment source for pelvic inflammatory  
43  
44 disease. Trends and projections, 1983 through 2000. *JAMA* 1991;**266**:2565-9  
45  
46 Online First: 1991/11/13].  
47  
48 15. Creanga AA, Shapiro-Mendoza CK, Bish CL, *et al.* Trends in ectopic pregnancy  
49  
50 mortality in the United States: 1980-2007. *Obstet Gynecol* 2011;**117**:837-43  
51  
52 doi: 10.1097/AOG.0b013e3182113c10published Online First: 2011/03/23].  
53  
54  
55 16. Der EM, Moyer C, Gyasi RK, *et al.* Pregnancy related causes of deaths in Ghana:  
56  
57 a 5-year retrospective study. *Ghana Med J* 2013;**47**:158-63 Online First:  
58  
59 2014/03/29].  
60

- 1  
2  
3 17. Groneberg-Kloft B, Quarcoo D, Scutaru C. Quality and quantity indices in  
4 science: use of visualization tools. *EMBO Rep* 2009;**10**:800-3 doi:  
5 10.1038/embor.2009.162published Online First: 2009/08/04].  
6  
7  
8  
9  
10 18. Groneberg-Kloft B, Fischer TC, Quarcoo D, *et al.* New quality and quantity  
11 indices in science (NewQIS): the study protocol of an international project. *J*  
12 *Occup Med Toxicol* 2009;**4**:16 doi: 10.1186/1745-6673-4-16published Online  
13 First: 2009/06/27].  
14  
15  
16  
17  
18 19. Gastner M, Newman M. From The Cover: Diffusion-based method for producing  
19 density-equalizing maps. *Proceedings of the National Academy of Sciences of*  
20 *the United States of America* 2004;**101**:7499 - 504 Online First.  
21  
22  
23  
24  
25 20. Groneberg DA, Rahimian S, Bundschuh M, *et al.* Telemedicine - a scientometric  
26 and density equalizing analysis. *J Occup Med Toxicol* 2015;**10**:38 doi:  
27 10.1186/s12995-015-0076-3published Online First: 2015/10/27].  
28  
29  
30  
31  
32 21. Quarcoo D, Bruggmann D, Klingelhofer D, *et al.* Ebola and Its Global Research  
33 Architecture--Need for an Improvement. *PLoS Negl Trop Dis*  
34 2015;**9**:e0004083 doi: 10.1371/journal.pntd.0004083published Online First:  
35 2015/09/26].  
36  
37  
38  
39  
40  
41 22. Schreiber M, Klingelhofer D, Groneberg DA, *et al.* Patient safety: the landscape  
42 of the global research output and gender distribution. *BMJ Open*  
43 2016;**6**:e008322 doi: 10.1136/bmjopen-2015-008322published Online First:  
44 2016/02/14].  
45  
46  
47  
48  
49  
50 23. Groneberg DA, Weber E, Gerber A, *et al.* Density equalizing mapping of the  
51 global tuberculosis research architecture. *Tuberculosis (Edinb)* 2015;**95**:515-  
52 22 doi: 10.1016/j.tube.2015.05.003published Online First: 2015/06/03].  
53  
54  
55  
56  
57 24. Gerber A, Klingelhofer D, Groneberg DA, *et al.* Silicosis: geographic changes in  
58 research: an analysis employing density-equalizing mapping. *J Occup Med*  
59  
60

- 1  
2  
3 *Toxicol* 2014;**9**:2 doi: 10.1186/1745-6673-9-2published Online First:  
4  
5 2014/01/21].  
6  
7  
8 25. Gerber A, Groneberg DA, Klingelhofer D, *et al.* Gout: a critical analysis of  
9  
10 scientific development. *Rheumatol Int* 2013;**33**:2743-50 doi: 10.1007/s00296-  
11  
12 013-2805-1published Online First: 2013/06/26].  
13  
14 26. Bruggmann D, Handl V, Klingelhofer D, *et al.* Congenital toxoplasmosis: an in-  
15  
16 depth density-equalizing mapping analysis to explore its global research  
17  
18 architecture. *Parasit Vectors* 2015;**8**:646 doi: 10.1186/s13071-015-1263-  
19  
20 xpublished Online First: 2015/12/23].  
21  
22  
23 27. Pleger N, Kloft B, Quarcoo D, *et al.* Bacterial meningitis: a density-equalizing  
24  
25 mapping analysis of the global research architecture. *Int J Environ Res Public*  
26  
27 *Health* 2014;**11**:10202-14 doi: 10.3390/ijerph111010202published Online First:  
28  
29 2014/10/02].  
30  
31  
32 28. Bruggmann D, Maule LS, Klingelhofer D, *et al.* World-wide architecture of  
33  
34 osteoporosis research: density-equalizing mapping studies and gender  
35  
36 analysis. *Climacteric* 2016;**19**:463-70 doi:  
37  
38 10.1080/13697137.2016.1200548published Online First: 2016/06/30].  
39  
40  
41 29. Bruggmann D, Wagner C, Klingelhofer D, *et al.* Maternal depression research:  
42  
43 socioeconomic analysis and density-equalizing mapping of the global research  
44  
45 architecture. *Arch Womens Ment Health* 2017;**20**:25-37 doi: 10.1007/s00737-  
46  
47 016-0669-6published Online First: 2016/09/30].  
48  
49  
50 30. Bruggmann D, Elizabeth-Martinez A, Klingelhofer D, *et al.* Endometriosis and its  
51  
52 global research architecture: an in-depth density-equalizing mapping analysis.  
53  
54 *BMC Womens Health* 2016;**16**:64 doi: 10.1186/s12905-016-0336-0published  
55  
56 Online First: 2016/09/23].  
57  
58  
59  
60

- 1  
2  
3 31. Bruggmann D, Lohlein LK, Louwen F, *et al.* Caesarean Section--A Density-  
4 Equalizing Mapping Study to Depict Its Global Research Architecture. *Int J*  
5 *Environ Res Public Health* 2015;**12**:14690-708 doi:  
6 10.3390/ijerph121114690published Online First: 2015/11/26].  
7  
8  
9  
10  
11 32. Bundschuh M, Groneberg DA, Klingelhofer D, *et al.* Yellow fever disease:  
12 density equalizing mapping and gender analysis of international research  
13 output. *Parasit Vectors* 2013;**6**:331 doi: 10.1186/1756-3305-6-331published  
14 Online First: 2013/11/20].  
15  
16  
17  
18 33. Khan KS, Wojdyla D, Say L, *et al.* WHO analysis of causes of maternal death: a  
19 systematic review. *Lancet* 2006;**367**:1066-74 doi: 10.1016/s0140-  
20 6736(06)68397-9published Online First: 2006/04/04].  
21  
22  
23  
24 34. Kalman S, Mitchell W, Marathe R, *et al.* Comparative genomes of Chlamydia  
25 pneumoniae and C. trachomatis. *Nat Genet* 1999;**21**:385-9 doi:  
26 10.1038/7716published Online First: 1999/04/07].  
27  
28  
29 35. Westrom L, Joesoef R, Reynolds G, *et al.* Pelvic inflammatory disease and  
30 fertility. A cohort study of 1,844 women with laparoscopically verified disease  
31 and 657 control women with normal laparoscopic results. *Sex Transm Dis*  
32 1992;**19**:185-92 Online First: 1992/07/01].  
33  
34  
35 36. Cates W, Jr., Wasserheit JN. Genital chlamydial infections: epidemiology and  
36 reproductive sequelae. *Am J Obstet Gynecol* 1991;**164**:1771-81 Online First:  
37 1991/06/01].  
38  
39  
40 37. Black CM. Current methods of laboratory diagnosis of Chlamydia trachomatis  
41 infections. *Clin Microbiol Rev* 1997;**10**:160-84 Online First: 1997/01/01].  
42  
43  
44 38. Miller WC, Ford CA, Morris M, *et al.* Prevalence of chlamydial and gonococcal  
45 infections among young adults in the United States. *JAMA* 2004;**291**:2229-36  
46 doi: 10.1001/jama.291.18.2229published Online First: 2004/05/13].  
47  
48  
49  
50  
51  
52  
53  
54  
55  
56  
57  
58  
59  
60

- 1  
2  
3 39. Cnattingius S. The epidemiology of smoking during pregnancy: smoking  
4 prevalence, maternal characteristics, and pregnancy outcomes. *Nicotine Tob*  
5 *Res* 2004;**6 Suppl 2**:S125-40 doi: 10.1080/14622200410001669187published  
6  
7 Online First: 2004/06/19].  
8  
9  
10  
11 40. Stovall TG, Ling FW. Single-dose methotrexate: an expanded clinical trial. *Am J*  
12 *Obstet Gynecol* 1993;**168**:1759-62; discussion 62-5 Online First: 1993/06/01].  
13  
14 41. Kadar N, Caldwell BV, Romero R. A method of screening for ectopic pregnancy  
15 and its indications. *Obstet Gynecol* 1981;**58**:162-6 Online First: 1981/08/01].  
16  
17  
18  
19 42. Nybo Andersen AM, Wohlfahrt J, Christens P, *et al.* Maternal age and fetal loss:  
20 population based register linkage study. *BMJ* 2000;**320**:1708-12 Online First:  
21 2000/06/23].  
22  
23  
24  
25  
26 43. Tanaka T, Hayashi H, Kutsuzawa T, *et al.* Treatment of interstitial ectopic  
27 pregnancy with methotrexate: report of a successful case. *Fertil Steril*  
28 1982;**37**:851-2 Online First: 1982/06/01].  
29  
30  
31  
32  
33 44. Kadar N, DeVore G, Romero R. Discriminatory hCG zone: its use in the  
34 sonographic evaluation for ectopic pregnancy. *Obstet Gynecol* 1981;**58**:156-  
35 61 Online First: 1981/08/01].  
36  
37  
38  
39 45. Pouly JL, Mahnes H, Mage G, *et al.* Conservative laparoscopic treatment of 321  
40 ectopic pregnancies. *Fertil Steril* 1986;**46**:1093-7 Online First: 1986/12/01].  
41  
42  
43  
44 46. Westrom L, Bengtsson LP, Mardh PA. Incidence, trends, and risks of ectopic  
45 pregnancy in a population of women. *Br Med J (Clin Res Ed)* 1981;**282**:15-8  
46 Online First: 1981/01/03].  
47  
48  
49  
50 47. Peyron R, Aubeny E, Targosz V, *et al.* Early termination of pregnancy with  
51 mifepristone (RU 486) and the orally active prostaglandin misoprostol. *N Engl*  
52 *J Med* 1993;**328**:1509-13 doi: 10.1056/nejm199305273282101published  
53 Online First: 1993/05/27].  
54  
55  
56  
57  
58  
59  
60

- 1  
2  
3 48. Aleixandre-Benavent R, Simon C, Fauser BC. Trends in clinical reproductive  
4  
5 medicine research: 10 years of growth. *Fertil Steril* 2015;**104**:131-7 e5 doi:  
6  
7 10.1016/j.fertnstert.2015.03.025published Online First: 2015/05/06].  
8  
9  
10 49. Bruggmann D, Berges L, Klingelhofer D, *et al.* Polycystic ovary syndrome:  
11  
12 analysis of the global research architecture using density equalizing mapping.  
13  
14 *Reprod Biomed Online* 2017 doi: 10.1016/j.rbmo.2017.03.010published Online  
15  
16 First: 2017/04/05].  
17  
18 50. Bruggmann D, Pulch K, Klingelhofer D, *et al.* Ovarian cancer: density equalizing  
19  
20 mapping of the global research architecture. *Int J Health Geogr* 2017;**16**:3 doi:  
21  
22 10.1186/s12942-016-0076-2published Online First: 2017/01/15].  
23  
24 51. Kotepui M, Wannaiampikul S, Chupeerach C, *et al.* A bibliometric analysis of  
25  
26 diets and breast cancer research. *Asian Pac J Cancer Prev* 2014;**15**:7625-8  
27  
28 Online First: 2014/10/09].  
29  
30 52. Moghimi M, Fathi M, Marashi A, *et al.* A scientometric analysis of 20 years of  
31  
32 research on breast reconstruction surgery: a guide for research design and  
33  
34 journal selection. *Arch Plast Surg* 2013;**40**:109-15 doi:  
35  
36 10.5999/aps.2013.40.2.109published Online First: 2013/03/28].  
37  
38 53. Healy NA, Glynn RW, Scutaru C, *et al.* The h index and the identification of global  
39  
40 benchmarks for breast cancer research output. *Breast Cancer Res Treat*  
41  
42 2011;**127**:845-51 doi: 10.1007/s10549-011-1436-zpublished Online First:  
43  
44 2011/03/15].  
45  
46 54. Glynn RW, Scutaru C, Kerin MJ, *et al.* Breast cancer research output, 1945-2008:  
47  
48 a bibliometric and density-equalizing analysis. *Breast Cancer Res*  
49  
50 2010;**12**:R108 doi: 10.1186/bcr2795published Online First: 2010/12/24].  
51  
52  
53  
54  
55  
56  
57  
58  
59  
60

- 1  
2  
3 55. Society AC. Cancer Facts & Figures 2015. Secondary Cancer Facts & Figures  
4  
5 2015 2015.  
6  
7 <http://www.cancer.org/research/cancerfactsstatistics/cancerfactsfigures2015/>.  
8  
9  
10 56. Mund M, Kloft B, Bundschuh M, *et al*. Global research on smoking and  
11 pregnancy-a scientometric and gender analysis. *Int J Environ Res Public*  
12 *Health* 2014;**11**:5792-806 doi: 10.3390/ijerph110605792published Online First:  
13 2014/06/01].  
14  
15  
16  
17  
18 57. Chen XL, Chen ZR, Cao ZL, *et al*. The 100 most cited articles in ectopic  
19 pregnancy: a bibliometric analysis. *Springerplus* 2016;**5**:1815 doi:  
20 10.1186/s40064-016-3503-8published Online First: 2016/11/03].  
21  
22  
23  
24  
25 58. Link AM. US and non-US submissions: an analysis of reviewer bias. *JAMA*  
26 1998;**280**:246-7 Online First: 1998/07/24].  
27  
28  
29  
30 59. Groneberg-Kloft B, Scutaru C, Kreiter C, *et al*. Institutional operating figures in  
31 basic and applied sciences: scientometric analysis of quantitative output  
32 benchmarking. *Health Res Policy Syst* 2008;**6**:6 doi: 10.1186/1478-4505-6-  
33 6published Online First: 2008/06/17].  
34  
35  
36  
37  
38 60. Goldner TE, Lawson HW, Xia Z, *et al*. Surveillance for ectopic pregnancy--United  
39 States, 1970-1989. *MMWR CDC Surveill Summ* 1993;**42**:73-85 Online First:  
40 1993/12/17].  
41  
42  
43  
44  
45 61. Nagaya K, Fetters MD, Ishikawa M, *et al*. Causes of maternal mortality in Japan.  
46 *JAMA* 2000;**283**:2661-7 Online First: 2000/05/20].  
47  
48  
49  
50  
51  
52  
53  
54  
55  
56  
57  
58  
59  
60



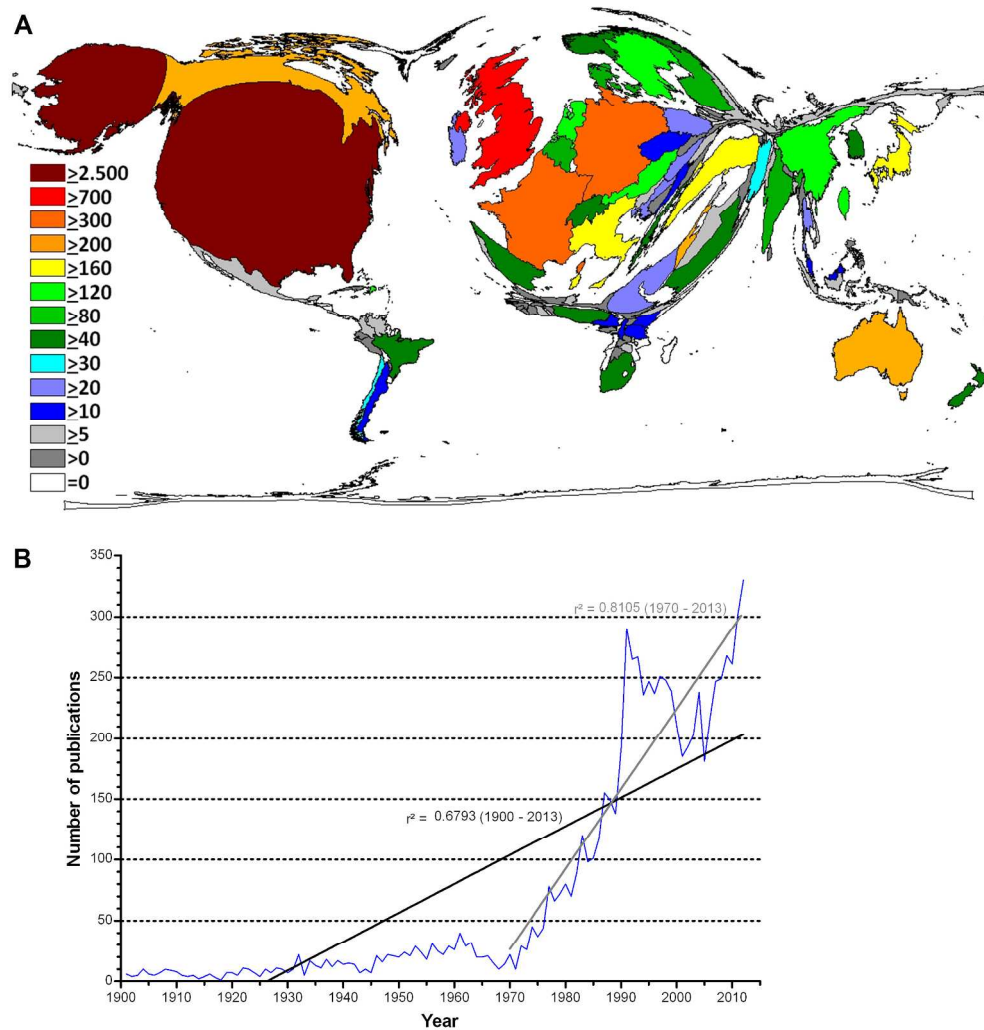

Publication output. A) Global Density-equalizing mapping of ectopic pregnancy publications. The area of each country is scaled in proportion to its total number of ectopic pregnancy-related publications. Colours encode numbers of ectopic pregnancy publications. B) Timely evolution of ectopic pregnancy-related publications.

250x260mm (300 x 300 DPI)



. Density-equalizing maps. A) Density-equalizing map of country total citations of ectopic pregnancy-related publications. The area of each country was scaled in proportion to its total number of ectopic pregnancy-related citations. Colours encode numbers of ectopic pregnancy-related citations. B) Density-equalizing map of country specific H-Index of ectopic pregnancy-related publications. The area of each country was scaled in proportion to the countries' specific H-Index. C) Density-equalizing map of country specific citations per ectopic pregnancy-related publication. Colours encode ectopic pregnancy-related citation rate levels.

250x394mm (300 x 300 DPI)

1  
2  
3  
4  
5  
6  
7  
8  
9  
10  
11  
12  
13  
14  
15  
16  
17  
18  
19  
20  
21  
22  
23  
24  
25  
26  
27  
28  
29  
30  
31  
32  
33  
34  
35  
36  
37  
38  
39  
40  
41  
42  
43  
44  
45  
46  
47  
48  
49  
50  
51  
52  
53  
54  
55  
56  
57  
58  
59  
60

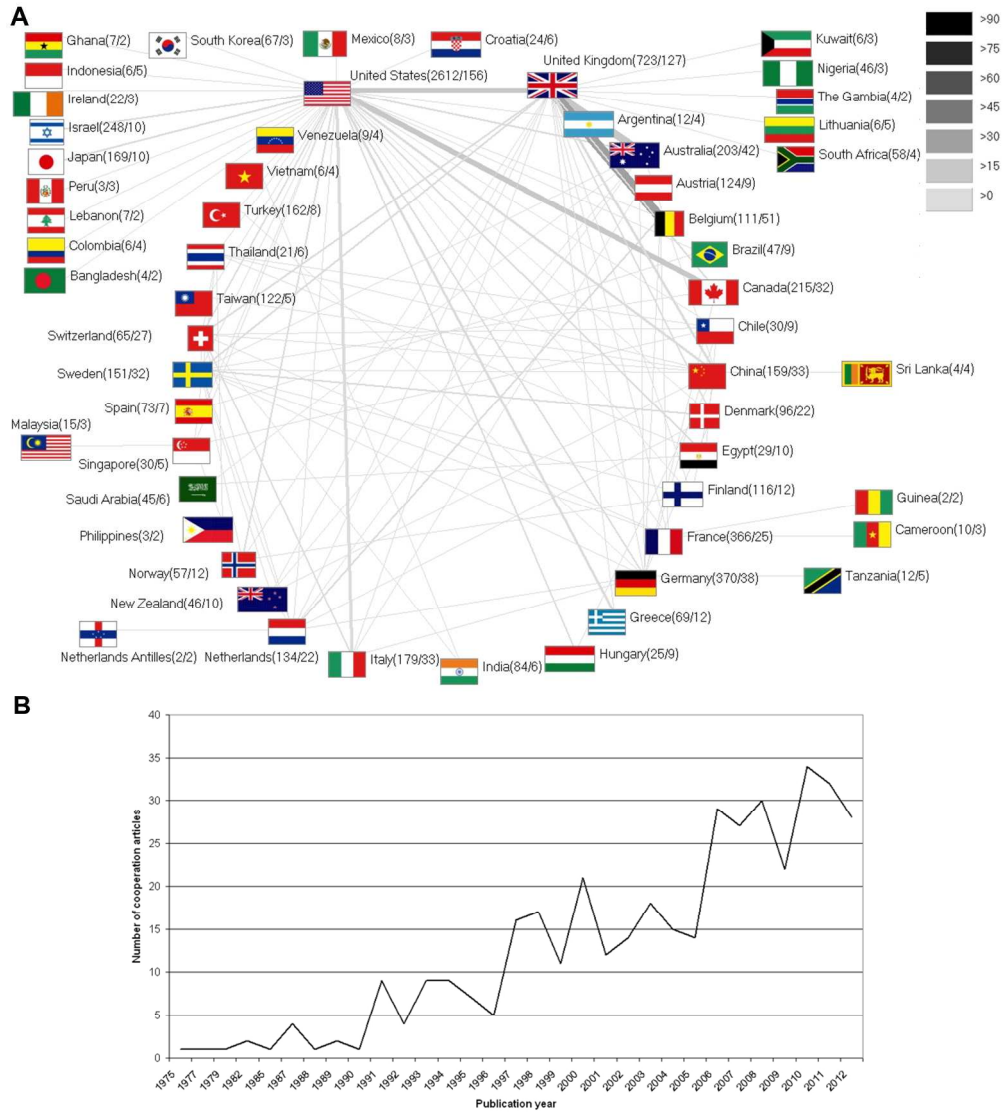

International collaboration. A) Net diagram of international ectopic pregnancy-related collaborations. Line width and grey scale encode numbers of ectopic pregnancy-related collaborations. Numbers in brackets indicate: (number of ectopic pregnancy-related publications of a specific country/number of ectopic pregnancy-related collaboration articles of a specific country). B) Timely evolution of number of ectopic pregnancy-related international collaborations per year.

250x279mm (300 x 300 DPI)



Subject area analysis. A) Timely evolution of subject areas assigned to the ectopic pregnancy-related publications in 5-year periods. Proportion of the 10 most assigned subject areas in 5-year intervals in order to gain insights into the field activity. B) Citation analysis of the 10 most assigned subject areas of all ectopic pregnancy-related publications.

150x181mm (300 x 300 DPI)

1  
2  
3  
4  
5  
6  
7  
8  
9  
10  
11  
12  
13  
14  
15  
16  
17  
18  
19  
20  
21  
22  
23  
24  
25  
26  
27  
28  
29  
30  
31  
32  
33  
34  
35  
36  
37  
38  
39  
40  
41  
42  
43  
44  
45  
46  
47  
48  
49  
50  
51  
52  
53  
54  
55  
56  
57  
58  
59  
60



Country-specific analysis of assigned subject categories. Analysis was performed of the 10 most active countries in ectopic pregnancy research in order to identify regional differences in ectopic pregnancy research.

150x95mm (300 x 300 DPI)

View only

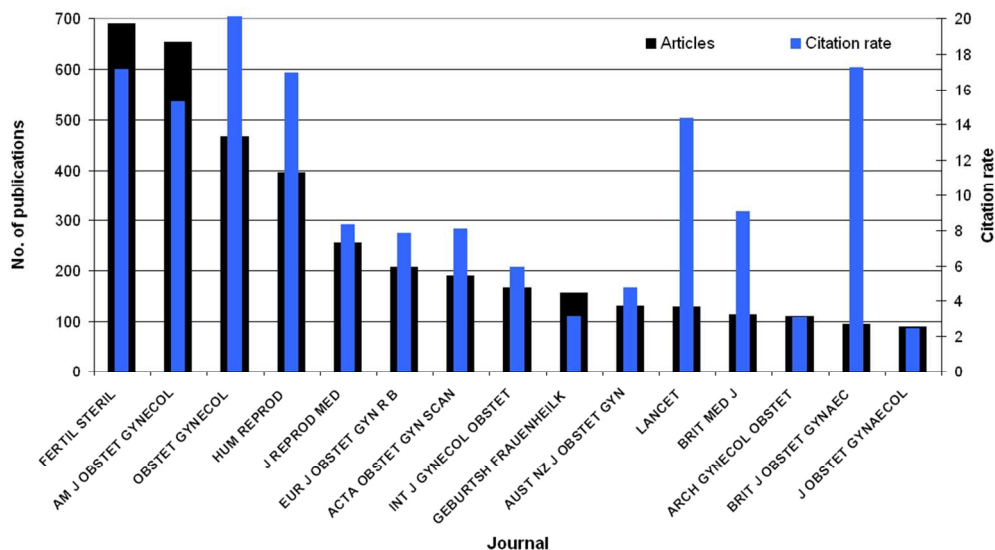

Number of articles and average citation rate of the most publishing journals on ectopic pregnancy.

150x84mm (300 x 300 DPI)

review only

1  
2  
3  
4  
5  
6  
7  
8  
9  
10  
11  
12  
13  
14  
15  
16  
17  
18  
19  
20  
21  
22  
23  
24  
25  
26  
27  
28  
29  
30  
31  
32  
33  
34  
35  
36  
37  
38  
39  
40  
41  
42  
43  
44  
45  
46  
47  
48  
49  
50  
51  
52  
53  
54  
55  
56  
57  
58  
59  
60
